# Supplementary material
Source: PubMed Central journal article supplement (PMC2727875)
Supplement: NIHMS132640-supplement-1_si_001.pdf [file NIHMS132640-supplement-1_si_001.pdf]

# Pd(0)/PR<sub>3</sub>-Catalyzed Intermolecular Arylation of *sp*<sup>3</sup> C–H Bonds

Masayuki Wasa, Keary M. Engle, Jin-Quan Yu\*

Department of Chemistry, The Scripps Research Institute, 10550 North Torrey Pines Road,  
La Jolla, California 92037

## Table of Contents

|                                                      |       |
|------------------------------------------------------|-------|
| General Information                                  | SI 1  |
| Substrate Structures                                 | SI 2  |
| Experimental Section                                 |       |
| Substrate Preparation                                | SI 2  |
| Pd(0)-catalyzed <i>sp</i> <sup>3</sup> C–H Arylation | SI 7  |
| Amide Hydrolysis                                     | SI 16 |
| References                                           | SI 17 |
| <sup>1</sup> H and <sup>13</sup> C NMR Spectra       | SI 18 |

**General Information:** Solvents were obtained from Sigma-Aldrich, Alfa-Aesar and Acros and used directly without further purification. Carboxylic acids or carboxylic acid chlorides were obtained from the commercial sources and converted to corresponding amides by literature procedure.<sup>1,2</sup>

Analytical thin layer chromatography was performed on 0.25 mm silica gel 60-F254. Visualization was carried out with UV light and Vogel's permanganate. NMR spectra were recorded on a Varian Inova-400 instrument and calibrated using residual undeuterated solvent as an internal reference. The following abbreviations (or combinations thereof) were used to explain multiplicities: s = singlet, d = doublet, t = triplet, m = multiplet, b = broad. High-resolution mass spectra (HRMS) were recorded on an Agilent Mass spectrometer using ESI-TOF (electrospray ionization-time of flight). IR spectra were recorded on a Perkin Elmer Spectrum BX FTIR spectrometer.

## Substrate Structures

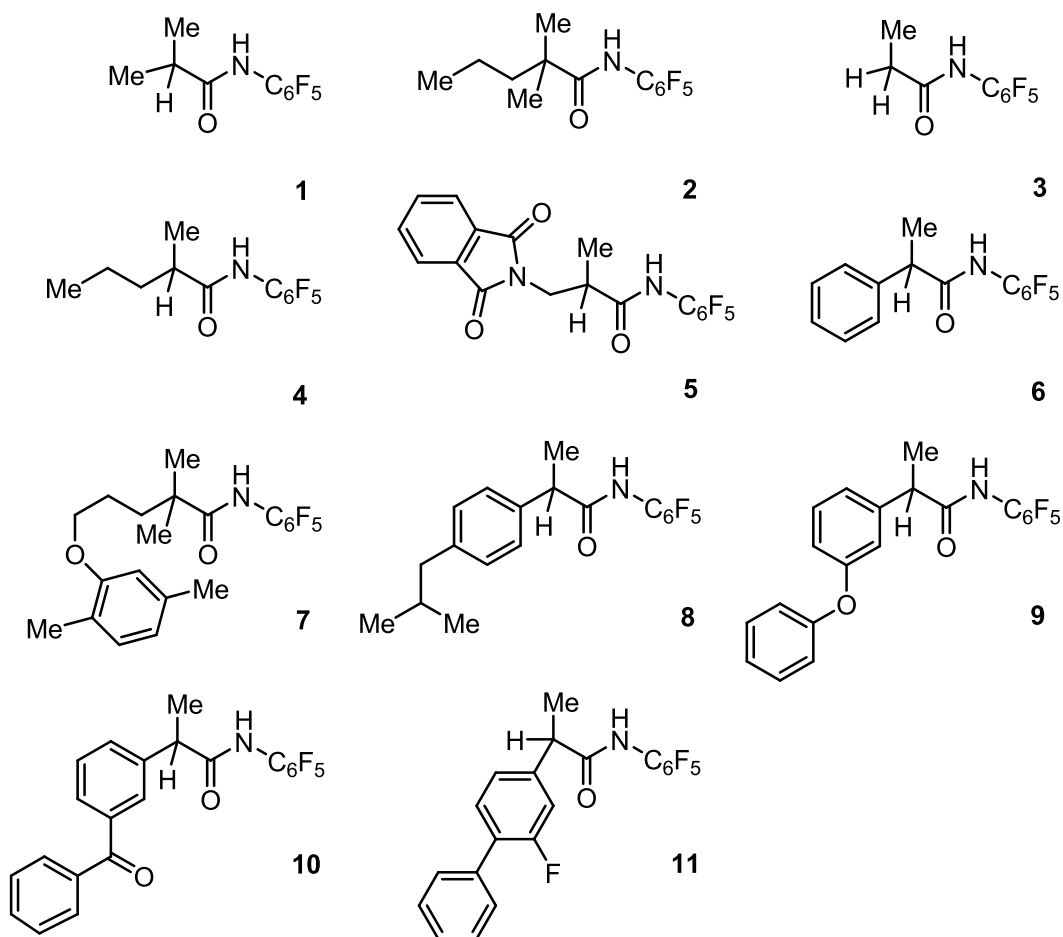

## Experimental Section

### A. Substrate Preparation

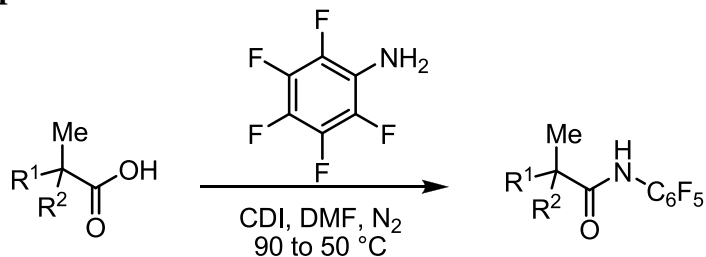

**Preparation of Substrates 1, 3–6, 8–11:**<sup>1</sup> A solution of acid (20 mmol) and CDI (22 mmol) in DMF (20 mL) was stirred at 90 °C for 1 h under a moisture-free atmosphere, then the reaction mixture was allowed to cool to room temperature. 2,3,4,5,6-pentafluoroaniline (22 mmol) was added and the reaction mixture was stirred at 50 °C for 10 h. After cooling to room temperature, CH<sub>2</sub>Cl<sub>2</sub> (100 mL) was added, and the resulting

solution was washed successively with 50 mL of 1% aqueous  $\text{Na}_2\text{CO}_3$ , water, 1% HCl and again with water. The solvent was evaporated *in vacuo*, and resulting formed precipitate was filtered off, washed with ether, and dried. The products were recrystallized from toluene (100 °C to 0 °C).

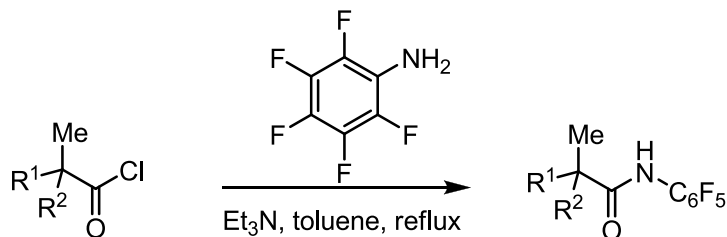

**Preparation of Substrates 2 and 7:**<sup>2</sup> An acid chloride (20 mmol), prepared from the corresponding carboxylic acid and oxalyl chloride, was added to a vigorously stirring solution of 2,3,4,5,6-pentafluoroaniline (22 mmol) and triethylamine (22 mmol) in toluene (50 mL). The reaction mixture was stirred for 6 h under reflux, and then stirred at room temperature for 4 h. The white precipitate was filtered off and washed with water, and recrystallized from toluene (100 °C to 0 °C) to give the product.

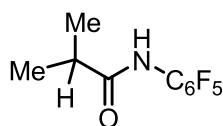

**1**

### 2-methyl-N-(perfluorophenyl)propanamide (1)

$^1\text{H}$  NMR (400 MHz,  $\text{CDCl}_3$ )  $\delta$  6.78 (bs, 1H), 2.68–2.61 (m, 1H), 1.30 (d,  $J$  = 6.8 Hz, 6H);

$^{13}\text{C}$  NMR (100 MHz,  $\text{CDCl}_3$ )  $\delta$  175.57, 35.54, 19.41.

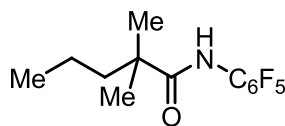

**2**

### 2,2-dimethyl-N-(perfluorophenyl)pentanamide (2)

$^1\text{H}$  NMR (400 MHz,  $\text{CDCl}_3$ )  $\delta$  6.86 (bs, 1H), 1.61–1.57 (m, 2H), 1.40–1.30 (m, 2H), 1.30 (s, 6H), 0.94 (t,  $J$  = 7.2 Hz, 3H);  $^{13}\text{C}$  NMR (100 MHz,  $\text{CDCl}_3$ )  $\delta$  176.78, 43.62, 43.06, 25.28, 17.95, 14.40;

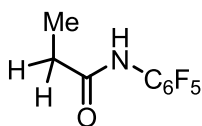

3

**N-(perfluorophenyl)propanamide (3)**

$^1\text{H}$  NMR (400 MHz,  $\text{CDCl}_3$ )  $\delta$  6.75 (bs, 1H), 2.48 (q,  $J = 7.6$  Hz, 2H), 1.69 (t,  $J = 7.6$  Hz, 3H);  $^{13}\text{C}$  NMR (100 MHz,  $\text{CDCl}_3$ )  $\delta$  172.79, 29.16, 9.34;

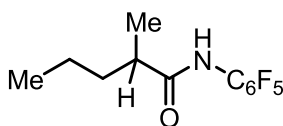

4

**2-methyl-N-(perfluorophenyl)pentanamide (4)**

$^1\text{H}$  NMR (400 MHz,  $\text{CDCl}_3$ )  $\delta$  6.67 (bs, 1H), 2.50–2.43 (m, 1H), 1.77–1.70 (m, 1H), 1.55–1.50 (m, 1H), 1.37–1.34 (m, 2H), 1.27 (d,  $J = 6.8$  Hz, 3H), 0.914 (t,  $J = 7.2$  Hz, 3H);  $^{13}\text{C}$  NMR (100 MHz,  $\text{CDCl}_3$ )  $\delta$  175.39, 33.99, 29.41, 22.61, 17.73, 13.86;

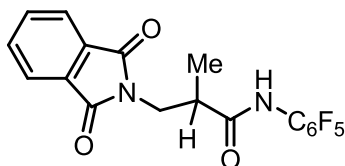

5

**2-methyl-3-(1,3-dioxisoindolin-2-yl)-N-(perfluorophenyl)propanamide (5)**

$^1\text{H}$  NMR (400 MHz,  $\text{CDCl}_3$ )  $\delta$  7.88–7.86 (m, 2H), 7.76–7.74 (m, 2H), 6.74 (bs, 1H), 4.10–4.04 (m, 1H), 3.83–3.80 (m, 1H), 3.21–3.16 (m, 1H), 3.16 (d,  $J = 7.2$  Hz, 3H);  $^{13}\text{C}$  NMR (100 MHz,  $\text{CDCl}_3$ )  $\delta$  175.96, 168.37, 134.31, 131.74, 123.53, 41.08, 40.09, 15.72.

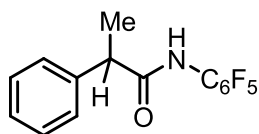

6

**N-(perfluorophenyl)-2-phenylpropanamide (6)**

$^1\text{H}$  NMR (400 MHz,  $\text{CDCl}_3$ )  $\delta$  7.40–7.26 (m, 5H) 6.52 (bs, 1H), 3.83 (q,  $J = 7.2$  Hz, 1H), 1.61 (d,  $J = 7.2$  Hz, 3H);  $^{13}\text{C}$  NMR (100 MHz,  $\text{CDCl}_3$ )  $\delta$  172.83, 140.19, 129.26, 127.84, 127.64, 47.00, 18.41;

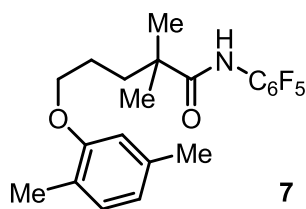

7

**2,2-dimethyl-6-(2,5-dimethylphenyl)-N-(perfluorophenyl)hexanamide (7)**

$^1\text{H}$  NMR (400 MHz,  $\text{CDCl}_3$ )  $\delta$  6.99 (d,  $J = 7.6$  Hz, 1H), 6.91 (bs, 1H), 6.66 (d,  $J = 7.6$  Hz, 1H), 6.62 (s, 1H), 3.97 (t,  $J = 5.2$  Hz, 2H), 2.30 (s, 3H), 2.15 (s, 3H), 1.87–1.85 (m, 4H);  $^{13}\text{C}$  NMR (100 MHz,  $\text{CDCl}_3$ )  $\delta$  176.15, 156.73, 136.59, 130.31, 123.40, 120.87, 112.08, 67.65, 42.91, 37.58, 25.55, 25.01, 21.33, 15.70.

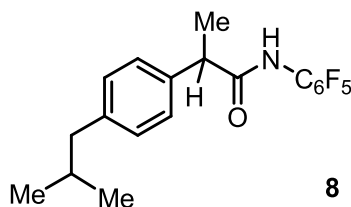

8

**2-(4-isobutylphenyl)-N-(perfluorophenyl)propanamide (8)**

$^1\text{H}$  NMR (400 MHz,  $\text{CDCl}_3$ )  $\delta$  7.26 (d,  $J = 8.0$  Hz, 2H), 7.18 (d,  $J = 8.0$  Hz, 2H), 6.52 (bs, 1H), 3.80 (q,  $J = 7.2$  Hz, 1H), 2.48 (d,  $J = 7.2$  Hz, 2H), 1.92–1.82 (m, 1H), 1.60 (d,  $J = 7.2$  Hz, 3H), 0.91 (d,  $J = 6.4$  Hz, 6H);  $^{13}\text{C}$  NMR (100 MHz,  $\text{CDCl}_3$ )  $\delta$  173.08, 141.46, 137.35, 129.99, 127.38, 46.67, 44.98, 30.15, 22.30, 18.32.

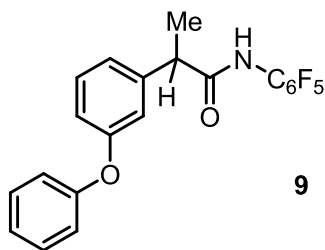

**N-(perfluorophenyl)-2-(3-phenoxyphenyl)propanamide (9)**

$^1\text{H}$  NMR (400 MHz,  $\text{CDCl}_3$ )  $\delta$  7.38–7.34 (m, 3H), 7.14–6.95 (m, 6H), 6.55 (bs, 1H), 3.90 (q,  $J = 7.2$  Hz, 1H), 1.59 (d,  $J = 7.2$  Hz, 3H);  $^{13}\text{C}$  NMR (100 MHz,  $\text{CDCl}_3$ )  $\delta$  172.25, 158.22, 156.55, 142.10, 130.63, 129.88, 123.76, 122.17, 119.18, 117.85, 117.84, 46.93, 18.29;

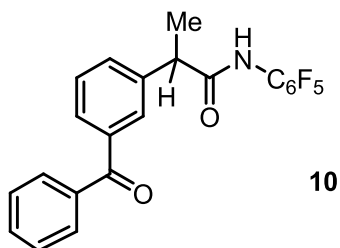

**2-(3-benzoylphenyl)-N-(perfluorophenyl)propanamide (10a)**

$^1\text{H}$  NMR (400 MHz,  $\text{CDCl}_3$ )  $\delta$  7.82–7.46 (m, 9H), 6.76 (bs, 1H), 3.91 (q,  $J = 6.8$  Hz, 1H), 1.63 (d,  $J = 7.2$  Hz, 3H);  $^{13}\text{C}$  NMR (100 MHz,  $\text{CDCl}_3$ )  $\delta$  196.75, 172.22, 144.32, 141.79, 140.93, 138.91, 138.21, 137.15, 136.40, 129.96, 129.13, 129.08, 128.38, 128.30, 46.76, 18.67;

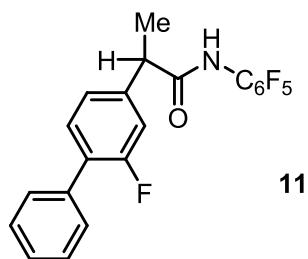

**2-(2-fluorobiphenyl-4-yl)-N-(perfluorophenyl)propanamide (11)**

$^1\text{H}$  NMR (400 MHz,  $\text{CDCl}_3$ )  $\delta$  7.56–7.37 (m, 6H), 7.23–7.17 (m, 2H), 6.63 (bs, 1H), 3.86 (q,  $J = 6.8$  Hz, 1H), 1.65 (d,  $J = 7.2$  Hz, 3H);  $^{13}\text{C}$  NMR (100 MHz,  $\text{CDCl}_3$ )  $\delta$  172.10, 161.17, 158.69, 141.36, 131.50, 131.46, 128.90, 128.87, 128.51, 127.90, 123.61, 123.58, 115.54, 115.30, 46.47, 18.51.

## B. Palladium(0)-catalyzed arylation of $sp^3$ C–H bonds (1a–11a)

### Optimization of reaction conditions <sup>a</sup>

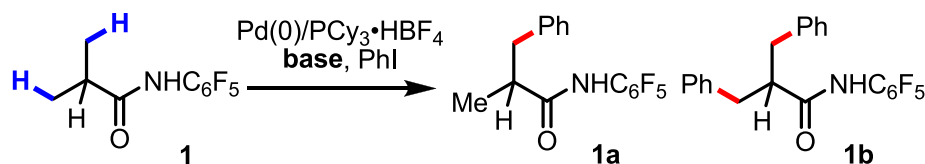

| entry | base                            | <sup>1</sup> H NMR yield (%) |           |
|-------|---------------------------------|------------------------------|-----------|
|       |                                 | <b>1a</b>                    | <b>1b</b> |
| 1     | NaOAc                           | 0                            | 0         |
| 2     | K <sub>2</sub> CO <sub>3</sub>  | 2                            | 0         |
| 3     | KO <sup>t</sup> Bu              | 0                            | 0         |
| 4     | K <sub>2</sub> HPO <sub>4</sub> | 4                            | 0         |
| 5     | NaOH                            | 0                            | 0         |
| 6     | Cs <sub>2</sub> CO <sub>3</sub> | 15                           | 2         |
| 7     | CsOAc                           | 8                            | 0         |
| 8     | CsF                             | 42                           | 20        |

<sup>a</sup> Conditions: 0.2 mmol of substrate, 10 mol% Pd(OAc)<sub>2</sub>, 20 mol% ligand, 3.0 equiv of base, 3.0 equiv of aryl iodide, 100 mg 3 Å MS, 1 mL toluene, 100 °C, N<sub>2</sub>, 24 h.

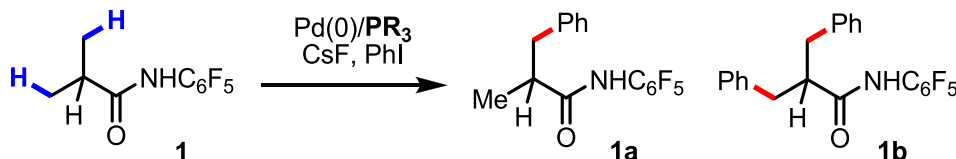

| entry | PR <sub>3</sub>                                    | <sup>1</sup> H NMR yield (%) |           | entry | PR <sub>3</sub>                                    | <sup>1</sup> H NMR yield (%) |           |
|-------|----------------------------------------------------|------------------------------|-----------|-------|----------------------------------------------------|------------------------------|-----------|
|       |                                                    | <b>1a</b>                    | <b>1b</b> |       |                                                    | <b>1a</b>                    | <b>1b</b> |
| 1     | PPh <sub>3</sub>                                   | 3                            | 0         | 10    | PAd <sub>2</sub> <sup>n</sup> Bu•HBF <sub>4</sub>  | 0                            | 0         |
| 2     | P( <i>p</i> -Tol) <sub>3</sub>                     | 2                            | 0         | 11    | PCy <sub>2</sub> ( <i>o</i> -Tol)•HBF <sub>4</sub> | 0                            | 0         |
| 3     | P <sup>i</sup> Pr <sub>3</sub> •HBF <sub>4</sub>   | 36                           | 18        | 12    | Cy-JohnPhos•HBF <sub>4</sub>                       | 34                           | 54        |
| 4     | PCy <sub>3</sub> •HBF <sub>4</sub>                 | 42                           | 20        | 13    | MePhos•HBF <sub>4</sub>                            | 38                           | 53        |
| 5     | P <sup>t</sup> Bu <sub>3</sub> •HBF <sub>4</sub>   | 0                            | 0         | 14    | DavePhos•HBF <sub>4</sub>                          | 48                           | 18        |
| 6     | P <sup>t</sup> Bu <sub>2</sub> Me•HBF <sub>4</sub> | 0                            | 0         | 15    | SPhos•HBF <sub>4</sub>                             | 11                           | 0         |
| 7     | PCy <sub>2</sub> <sup>t</sup> Bu•HBF <sub>4</sub>  | 8                            | 0         | 16    | RuPhos•HBF <sub>4</sub>                            | 5                            | 0         |
| 8     | PPhEt <sub>2</sub> •HBF <sub>4</sub>               | 10                           | 0         | 17    | XPhos•HBF <sub>4</sub>                             | 0                            | 0         |
| 9     | PPhHex <sub>2</sub> •HBF <sub>4</sub>              | 7                            | 0         |       |                                                    |                              |           |

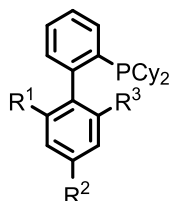

#### Cy-JohnPhos:

R<sup>1</sup>=R<sup>2</sup>=R<sup>3</sup>=H

#### MePhos:

R<sup>1</sup>=R<sup>2</sup>=H, R<sup>3</sup>=Me

#### DavePhos:

R<sup>1</sup>=R<sup>2</sup>=H, R<sup>3</sup>=NMe<sub>2</sub>

#### SPhos:

R<sup>1</sup>=R<sup>3</sup>=OMe, R<sup>2</sup>=H

#### RuPhos:

R<sup>1</sup>=R<sup>3</sup>=O<sup>i</sup>Pr, R<sup>2</sup>=H

#### XPhos:

R<sup>1</sup>=R<sup>2</sup>=R<sup>3</sup>=<sup>i</sup>Pr

<sup>a</sup> Conditions: 0.2 mmol of substrate, 10 mol% Pd(OAc)<sub>2</sub>, 20 mol% ligand, 3.0 equiv of CsF, 3.0 equiv of aryl iodide, 100 mg 3 Å MS, 1 mL toluene, 100 °C, N<sub>2</sub>, 24 h.

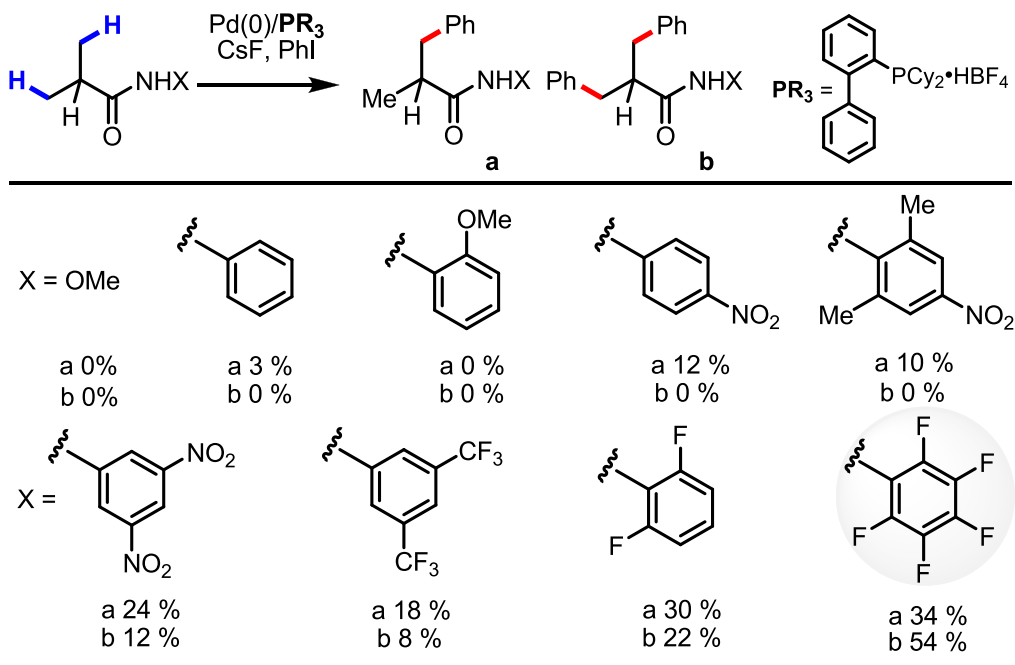

<sup>a</sup> Conditions: 0.2 mmol of substrate, 10 mol% Pd(OAc)<sub>2</sub>, 20 mol% Ligand, 3.0 equiv of CsF, 3.0 equiv of aryl iodide, 100 mg 3 Å MS, 1 mL toluene, 100 °C, N<sub>2</sub>, 24 h.

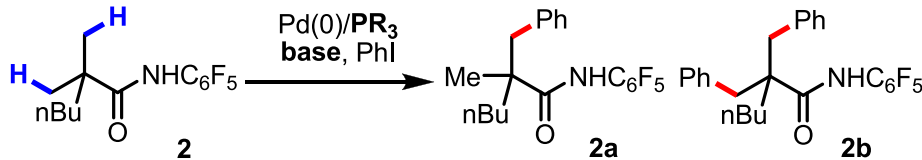

| entry | PR <sub>3</sub>                    | base                            | <sup>1</sup> H NMR yield (%) |    |
|-------|------------------------------------|---------------------------------|------------------------------|----|
|       |                                    |                                 | 2a                           | 2b |
| 1     | PPh <sub>3</sub>                   | Cs <sub>2</sub> CO <sub>3</sub> | 22                           | 12 |
| 2     | PCy <sub>3</sub> •HBF <sub>4</sub> | Cs <sub>2</sub> CO <sub>3</sub> | 41                           | 7  |
| 3     | Cy-JohnPhos•HBF <sub>4</sub>       | Cs <sub>2</sub> CO <sub>3</sub> | 72                           | 8  |

<sup>a</sup> Conditions: 0.2 mmol of substrate, 10 mol% Pd(OAc)<sub>2</sub>, 20 mol% Ligand, 3.0 equiv of Cs<sub>2</sub>CO<sub>3</sub>, 3.0 equiv of aryl iodide, 100 mg 3 Å MS, 1 mL toluene, 100 °C, N<sub>2</sub>, 24 h.

### General Reaction Scheme

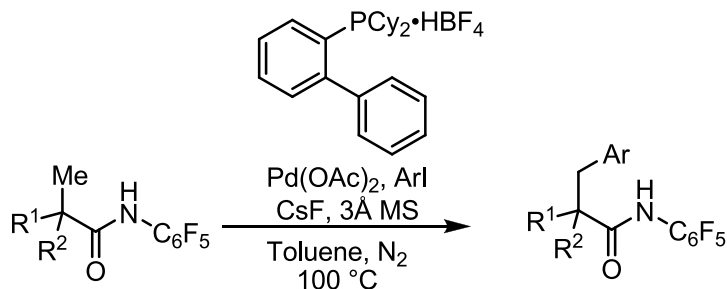

**General Procedure:** Substrate (0.2 mmol), Pd(OAc)<sub>2</sub> (10 mol%), Cyclohexyl JohnPhos (10 mol%), CsF (3.0 equiv), and flame-dried molecular sieves (100 mg) were weighed in air and placed in a Schlenk tube (25 mL) with a magnetic stir bar. Aryl iodide (2–3 equiv) and toluene (1 mL) were added, and the reaction vessel was immediately evacuated and backfilled with nitrogen (×3). The reaction mixture was heated to 100 °C for 24 hours under vigorous stirring. Upon completion, the reaction was cooled to room temperature and filtered through a pad of celite. The solvents were removed under reduced pressure and the resulting mixture was purified by a silica gel-packed flash chromatography column typically using hexane/ether mixtures as the eluent.

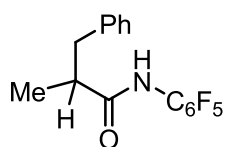

**1a**

### **2-methyl-N-(perfluorophenyl)-3-phenylpropanamide (1a)**

Substrate **1** was arylated following the general procedure. After purification by column chromatography, **1a** was obtained as a colorless solid (19.8 mg, 30%). <sup>1</sup>H NMR (400 MHz, CDCl<sub>3</sub>) δ 7.34–7.10 (m, 5H), 6.72 (bs, 1H), 3.10–2.97 (m, 1H), 2.83–2.71 (m, 2H), 1.31 (d, *J* = 6.8 Hz, 3H); <sup>13</sup>C NMR (100 MHz, CDCl<sub>3</sub>) δ 174.70, 139.29, 129.18, 128.95, 126.99, 44.07, 40.68, 18.14; IR (neat) ν 3256, 2927, 1682, 1498 cm<sup>-1</sup>; HRMS (ESI-TOF) Calcd for C<sub>16</sub>H<sub>12</sub>F<sub>5</sub>NO (MH<sup>+</sup>): 330.0912; found: 330.0907.

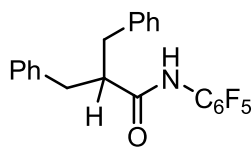

**1b**

### **2-benzyl-N-(perfluorophenyl)-3-phenylpropanamide (1b)**

Substrate **1** was arylated following the general procedure. After purification by column chromatography, **1a** was obtained as a colorless solid (43.0 mg, 53%). <sup>1</sup>H NMR (400 MHz, CDCl<sub>3</sub>) δ 7.32–7.20 (m, 8H), 6.12 (bs, 1H), 3.12–3.05 (m, 2H), 2.95–2.79 (m, 3H); <sup>13</sup>C NMR (100 MHz, CDCl<sub>3</sub>) δ 173.17, 139.16, 129.18, 129.03, 127.06, 53.38, 39.54; IR (neat)

$\nu$  3231, 2919, 1674, 1526, 1450  $\text{cm}^{-1}$ ; HRMS (ESI-TOF) Calcd for  $\text{C}_{22}\text{H}_{16}\text{F}_5\text{NO}$  ( $\text{MH}^+$ ): 406.1225; found: 406.1235.

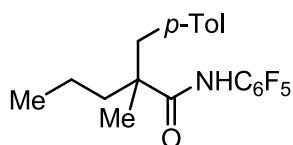

**2a**

### 2-methyl-2-(4-methylbenzyl)-N-(perfluorophenyl)pentanamide (2a)

Substrate **2** was arylated following the general procedure. After purification by column chromatography, **2a** was obtained as a colorless solid (45.9 mg, 78%). Di-arylated product was observed by  $^1\text{H}$  NMR (ca. 10%).  $^1\text{H}$  NMR (400 MHz,  $\text{CDCl}_3$ )  $\delta$  7.09–7.02 (m, 4H), 6.72 (bs, 1H), 3.13 (d,  $J = 13.2$  Hz, 2H), 2.66 (d,  $J = 13.2$  Hz, 2H), 2.31 (s, 3H) 1.90–1.76 (m, 1H), 1.49–1.21 (m, 6H), 0.96 (t,  $J = 7.2$  Hz, 3H);  $^{13}\text{C}$  NMR (100 MHz,  $\text{CDCl}_3$ )  $\delta$  175.56, 136.45, 134.08, 130.30, 129.07, 104.99, 48.39, 46.00, 43.01, 25.63, 20.79, 17.98, 14.74; IR (neat)  $\nu$  3275, 2962, 1671, 1522, 1490  $\text{cm}^{-1}$ ; HRMS (ESI-TOF) Calcd for  $\text{C}_{20}\text{H}_{20}\text{F}_5\text{NO}$  ( $\text{MH}^+$ ): 385.1465; found: 385.1470.

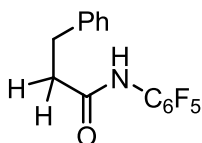

**3a**

### N-(perfluorophenyl)-3-phenylpropanamide (3a)

Substrate **3** was arylated following the general procedure. After purification by column chromatography, **3a** was obtained as a colorless solid (36.7 mg, 58%).  $^1\text{H}$  NMR (400 MHz,  $\text{CDCl}_3$ )  $\delta$  7.32–7.20 (m, 4H), 6.89 (bs, 1H), 3.05 (t,  $J = 7.6$  Hz, 2H), 2.75 (t,  $J = 7.6$  Hz, 2H);  $^{13}\text{C}$  NMR (100 MHz,  $\text{CDCl}_3$ )  $\delta$  171.10, 143.30, 129.03, 128.62, 126.90, 38.26, 31.64; IR (neat)  $\nu$  3264, 2921, 1680, 1530, 1495  $\text{cm}^{-1}$ ; HRMS (ESI-TOF) Calcd for  $\text{C}_{15}\text{H}_{10}\text{F}_5\text{NO}$  ( $\text{MH}^+$ ): 316.0755; found: 316.0755.

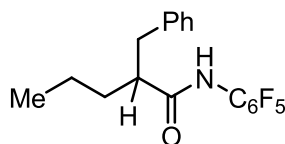

**4a**

**2-benzyl-N-(perfluorophenyl)pentanamide (4a)**

Substrate **4** was arylated following the general procedure. After purification by column chromatography, **4a** was obtained as a colorless solid (59.4 mg, 80%).  $^1\text{H}$  NMR (400 MHz,  $\text{CDCl}_3$ )  $\delta$  7.39–7.15 (m, 4H), 6.49 (bs, 1H), 2.95–2.82 (m, 1H), 2.82–2.80 (m, 1H), 2.61–2.54 (m, 1H), 2.04–1.99 (m, 1H), 1.88–1.68 (m, 1H), 1.53–1.32 (m, 4H), 0.93 (t,  $J$  = 6.8 Hz, 3H);  $^{13}\text{C}$  NMR (100 MHz,  $\text{CDCl}_3$ )  $\delta$  176.59, 139.50, 129.14, 128.98, 126.94, 105.13, 44.18, 39.73, 36.19, 33.13, 22.99, 14.25; IR (neat)  $\nu$  3274, 2901, 1650, 1520  $\text{cm}^{-1}$ ; HRMS (ESI-TOF) Calcd for  $\text{C}_{19}\text{H}_{18}\text{F}_5\text{NO}$  ( $\text{MH}^+$ ): 371.1309; found: 371.1310.

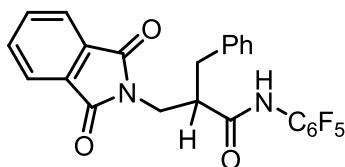

**5a**

**2-benzyl-3-(1,3-dioxoisindolin-2-yl)-N-(perfluorophenyl)propanamide (5a)**

Substrate **5** was arylated following the general procedure. After purification by column chromatography, **5a** was obtained as a colorless solid (60.7 mg, 64%).  $^1\text{H}$  NMR (400 MHz,  $\text{CDCl}_3$ )  $\delta$  7.86–7.73 (m, 4H), 7.30–7.16 (m, 4H), 6.74 (bs, 1H), 4.18–4.13 (m, 1H), 3.92–3.86 (m, 1H), 3.51–3.39 (m, 1H), 3.15–3.09 (m, 1H), 2.96–2.91 (m, 1H);  $^{13}\text{C}$  NMR (100 MHz,  $\text{CDCl}_3$ )  $\delta$  171.19, 168.62, 138.08, 134.61, 134.60, 129.11, 127.24, 123.82, 48.14, 40.61, 37.15; IR (neat)  $\nu$  3268, 2918, 2850, 1716, 1522, 1495  $\text{cm}^{-1}$ ; HRMS (ESI-TOF) Calcd for  $\text{C}_{24}\text{H}_{15}\text{F}_5\text{N}_2\text{O}$  ( $\text{MH}^+$ ): 475.1076; found: 475.1075.

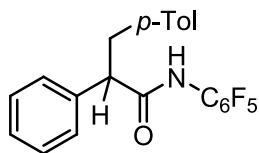

**6a**

**N-(perfluorophenyl)-2-phenyl-3-p-tolylpropanamide (6a)**

Substrate **6** was arylated following the general procedure. After purification by column chromatography, **6a** was obtained as a colorless solid (68.2 mg, 84%).  $^1\text{H}$  NMR (400 MHz,  $\text{CDCl}_3$ )  $\delta$  7.43–7.28 (m, 5H), 7.12–7.02 (m, 4H), 6.59 (s, 1H), 3.86 (t,  $J = 8.0$  Hz, 1H), 3.60–3.53 (m, 1H), 3.05–2.99 (m, 1H), 2.29 (s, 1H);  $^{13}\text{C}$  NMR (100 MHz,  $\text{CDCl}_3$ )  $\delta$  171.80, 138.81, 136.31, 136.10, 131.34, 129.43, 129.19, 128.50, 128.22, 55.81, 39.46, 21.37; IR (neat)  $\nu$  3247, 3027, 2923, 1677, 1651, 1523, 1458  $\text{cm}^{-1}$ ; HRMS (ESI-TOF) Calcd for  $\text{C}_{21}\text{H}_{13}\text{F}_6\text{NO}$  ( $\text{MH}^+$ ): 410.0974; found: 410.0985.

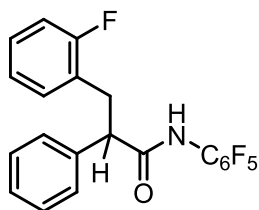

**6b**

### 3-(2-fluorophenyl)-N-(perfluorophenyl)-2-phenylpropanamide (**6b**)

Substrate **6** was arylated following the general procedure. After purification by column chromatography, **6b** was obtained as a colorless solid (56.0 mg, 68%).  $^1\text{H}$  NMR (400 MHz,  $\text{CDCl}_3$ )  $\delta$  7.43–6.94 (m, 9H), 6.70 (s, 1H), 4.00 (t,  $J = 8.0$  Hz, 1H), 3.63–3.53 (m, 1H), 3.16–3.11 (m, 1H);  $^{13}\text{C}$  NMR (100 MHz,  $\text{CDCl}_3$ )  $\delta$  171.54, 162.78, 160.35, 138.51, 129.41, 128.65, 128.29, 125.88, 124.31, 115.58, 115.36, 53.58, 33.63; IR (neat)  $\nu$  3250, 2923, 1677, 1523, 1498  $\text{cm}^{-1}$ ; HRMS (ESI-TOF) Calcd for  $\text{C}_{21}\text{H}_{13}\text{F}_6\text{NO}$  ( $\text{MH}^+$ ): 410.0974; found: 410.0966.

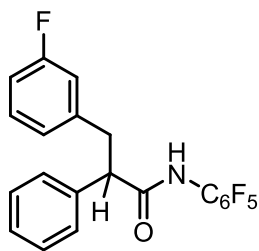

**6c**

### 3-(3-fluorophenyl)-N-(perfluorophenyl)-2-phenylpropanamide (**6c**)

Substrate **6** was arylated following the general procedure. After purification by column chromatography, **6c** was obtained as a colorless solid (59.0 mg, 72%).  $^1\text{H}$  NMR (400 MHz,

CDCl<sub>3</sub>)  $\delta$  7.43–7.28 (m, 5H), 7.12–7.02 (m, 4H), 6.59 (s, 1H), 3.86 (t,  $J$  = 8.0 Hz, 1H), 3.60–3.53 (m, 1H), 3.05–2.99 (m, 1H), 2.29 (s, 1H); <sup>13</sup>C NMR (100 MHz, CDCl<sub>3</sub>)  $\delta$  171.50, 164.31, 161.87, 141.75, 141.68, 138.32, 129.55, 128.42, 125.05, 116.30, 116.09, 113.85, 113.64, 55.32, 39.52; IR (neat)  $\nu$  3250, 2923, 1677, 1523, 1498 cm<sup>-1</sup>; HRMS (ESI-TOF) Calcd for C<sub>21</sub>H<sub>13</sub>F<sub>6</sub>NO (MH<sup>+</sup>): 410.0974; found: 410.0966.

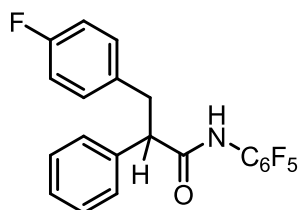

**6d**

### 3-(4-fluorophenyl)-N-(perfluorophenyl)-2-phenylpropanamide (6d)

Substrate **6** was arylated following the general procedure. After purification by column chromatography, **6d** was obtained as a colorless solid (54.1 mg, 66%). <sup>1</sup>H NMR (400 MHz, CDCl<sub>3</sub>)  $\delta$  7.41–7.29 (m, 5H), 7.08–7.05 (m, 2H), 6.95–6.75 (m, 2H), 6.59 (bs, 1H), 3.87 (t,  $J$  = 8.0 Hz, 1H), 3.60–3.55 (m, 1H), 3.08–2.03 (m, 1H); <sup>13</sup>C NMR (100 MHz, CDCl<sub>3</sub>)  $\delta$  171.61, 163.19, 160.76, 138.42, 134.84, 130.89, 128.50, 128.40, 115.62, 115.41, 55.76, 39.03; IR (neat)  $\nu$  3250, 2923, 1677, 1523, 1498 cm<sup>-1</sup>; HRMS (ESI-TOF) Calcd for C<sub>21</sub>H<sub>13</sub>F<sub>6</sub>NO (MH<sup>+</sup>): 410.0974; found: 410.0970.

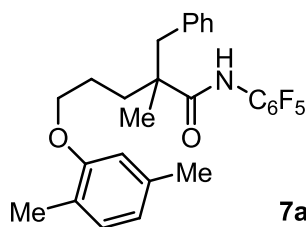

**7a**

### 2-benzyl-6-(2,5-dimethylphenyl)-2-methyl-N-(perfluorophenyl)hexanamide (7a)

Substrate **7** was arylated following the general procedure. After purification by column chromatography, **7a** was obtained as a colorless solid (59.0 mg, 60%). <sup>1</sup>H NMR (400 MHz, CDCl<sub>3</sub>)  $\delta$  7.42 (s, 1H), 7.30–7.24 (m, 5H), 6.98 (d,  $J$  = 7.6 Hz, 1H), 6.77 (s, 1H), 6.65 (d,  $J$  = 7.6 Hz, 1H), 3.99 (t,  $J$  = 6.0 Hz, 3H), 3.16 (d,  $J$  = 13.2 Hz, 2H), 2.80 (d,  $J$  = 13.2 Hz, 2H), 2.80 (s, 3H), 2.10 (s, 3H) 1.98–1.40 (m, 6H), 1.30 (s, 3H); <sup>13</sup>C NMR (100 MHz, CDCl<sub>3</sub>)  $\delta$  175.36, 157.02, 137.08, 136.95, 130.68, 130.58, 127.15, 123.78, 121.27, 112.50, 92.57,

67.98, 48.25, 46.67, 36.62, 25.07, 21.47, 16.06; IR (neat)  $\nu$  3296, 2924, 2869, 1675, 1523, 1490  $\text{cm}^{-1}$ ; HRMS (ESI-TOF) Calcd for  $\text{C}_{27}\text{H}_{26}\text{F}_5\text{NO}_2$  ( $\text{MH}^+$ ): 492.1956; found: 492.1959.

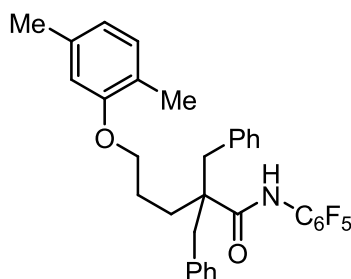

**7b**

**2,2-dibenzyl-6-(2,5-dimethylphenyl)-N-(perfluorophenyl)hexanamide (7b)**

Substrate **7** was arylated following the general procedure. After purification by column chromatography, **7b** was obtained as a colorless solid (25.0 mg, 22%).  $^1\text{H}$  NMR (400 MHz,  $\text{CDCl}_3$ )  $\delta$  7.30–7.21 (m, 10H), 6.93 (d,  $J$  = 8.0 Hz, 1H), 6.76–6.59 (m, 3H), 4.00 (t,  $J$  = 5.6 Hz, 2H), 3.27 (d,  $J$  = 13.6 Hz, 2H), 2.94 (d,  $J$  = 13.6 Hz, 2H), 2.28 (s, 3H), 2.20–2.08 (m, 2H), 1.96 (s, 3H), 1.87–1.77 (m, 2H);  $^{13}\text{C}$  NMR (100 MHz,  $\text{CDCl}_3$ )  $\delta$  174.63, 156.76, 137.00, 136.96, 130.64, 130.64, 128.74, 127.21, 123.68, 121.48, 112.43, 105.12, 67.79, 42.92, 30.05, 28.48, 21.68, 16.07; IR (neat)  $\nu$  3299, 2924, 2856, 1676, 1523, 1453  $\text{cm}^{-1}$ ; HRMS (ESI-TOF) Calcd for  $\text{C}_{33}\text{H}_{30}\text{F}_5\text{NO}_2$  ( $\text{MH}^+$ ): 568.2269; found: 568.2269.

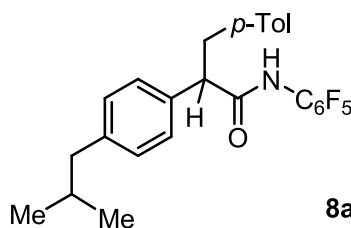

**8a**

**2-(4-isobutylphenyl)-N-(perfluorophenyl)-3-p-tolylpropanamide (8a)**

Substrate **8** was arylated following the general procedure. After purification by column chromatography, **8a** was obtained as a colorless solid (73.9 mg, 80%).  $^1\text{H}$  NMR (400 MHz,  $\text{CDCl}_3$ )  $\delta$  7.25–6.96 (m, 8H), 6.66 (s, 1H), 3.83 (t,  $J$  = 7.6 Hz, 1H), 3.54–3.50 (m, 1H), 3.01–2.98 (m, 1H), 2.47 (d,  $J$  = 7.2 Hz, 2H), 2.28 (s, 3H), 1.92–1.79 (m, 1H), 0.88 (d,  $J$  = 2.8 Hz, 6H);  $^{13}\text{C}$  NMR (100 MHz,  $\text{CDCl}_3$ )  $\delta$  172.06, 141.75, 136.28, 136.21, 136.05, 130.12, 129.36, 129.21, 128.19, 55.43, 45.35, 39.42, 30.51, 22.36, 21.36; IR (neat)  $\nu$  3270,

2957, 2926, 1683, 1523, 1487, 1450  $\text{cm}^{-1}$ ; HRMS (ESI-TOF) Calcd for  $\text{C}_{26}\text{H}_{24}\text{F}_5\text{NO}$  ( $\text{MH}^+$ ): 462.1851; found: 462.1850.

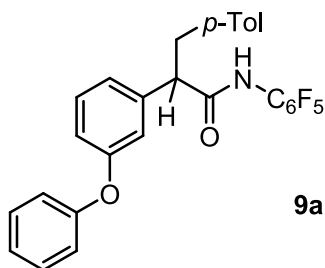

#### N-(perfluorophenyl)-2-(3-phenoxyphenyl)-3-p-tolylpropanamide (**9a**)

Substrate **9** was arylated following the general procedure. After purification by column chromatography, **9a** was obtained as a colorless solid (67.7 mg, 68%). Due to difficulty of the separation between substrate and product, 32% of product was isolated as a mixture (ratio determined by  $^1\text{H}$  NMR).  $^1\text{H}$  NMR (400 MHz,  $\text{CDCl}_3$ )  $\delta$  7.64–7.38 (m, 6H), 7.12–6.96 (m, 7H), 6.69 (s, 1H), 4.84–4.52 (m, 1H), 3.90–3.71 (m, 1H), 3.38–3.24 (m, 1H), 2.26 (s, 3H);  $^{13}\text{C}$  NMR (100 MHz,  $\text{CDCl}_3$ )  $\delta$  171.19, 156.54, 136.42, 136.10, 130.11, 129.83, 129.51, 129.09, 128.04, 127.83, 123.46, 119.23, 119.07, 112.27, 111.84, 37.60, 30.06, 21.35; IR (neat)  $\nu$  3269, 2920, 1683, 1523  $\text{cm}^{-1}$ ; HRMS (ESI-TOF) Calcd for  $\text{C}_{28}\text{H}_{20}\text{F}_5\text{NO}_2$  ( $\text{MH}^+$ ): 498.1414; found: 498.1414.

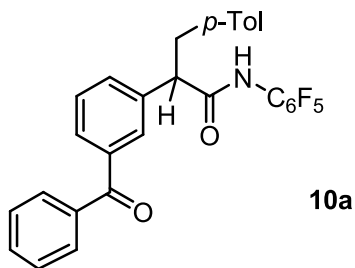

#### 2-(3-benzoylphenyl)-N-(perfluorophenyl)-3-p-tolylpropanamide (**10a**)

Substrate **10** was arylated following the general procedure. After purification by column chromatography, **10a** was obtained as a colorless solid (71.4 mg, 70%). Due to difficulty of the separation between substrate and product, 14% of product was isolated as a mixture (ratio determined by  $^1\text{H}$  NMR).  $^1\text{H}$  NMR (400 MHz,  $\text{CDCl}_3$ )  $\delta$  7.80–7.41 (m, 9H), 7.10 (s, 1H), 7.06–6.97 (m, 4H), 3.96 (t,  $J$  = 8.0 Hz, 1H), 3.56–3.51 (m, 1H), 3.07–3.01 (m, 1H), 2.38 (s, 3H);  $^{13}\text{C}$  NMR (100 MHz,  $\text{CDCl}_3$ )  $\delta$  196.93, 171.40, 138.26, 136.46, 135.65,

134.60, 132.11, 132.05, 130.41, 130.37, 129.89, 129.53, 129.44, 129.22, 128.86, 128.67, 55.47, 39.70, 21.39; IR (neat)  $\nu$  3271, 3059, 2922, 1658, 1522  $\text{cm}^{-1}$ ; HRMS (ESI-TOF) Calcd for  $\text{C}_{29}\text{H}_{20}\text{F}_5\text{NO}_2$  ( $\text{MH}^+$ ): 510.1487; found: 510.1495.

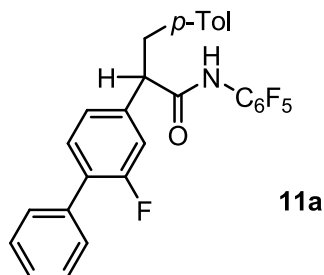

### 2-(2-fluorobiphenyl-4-yl)-N-(perfluorophenyl)-3-p-tolylpropanamide (**11a**)

Substrate **11** was arylated following the general procedure. After purification by column chromatography, **11a** was obtained as a colorless solid (72.0 mg, 72%). Due to difficulty of the separation between substrate and product, 18% of product was isolated as a mixture (ratio determined by  $^1\text{H}$  NMR).  $^1\text{H}$  NMR (400 MHz,  $\text{CDCl}_3$ )  $\delta$  7.59–7.35 (m, 6H), 7.03–6.71 (m, 6H), 6.71, (s, 1H), 3.89 (t,  $J = 7.2$  Hz, 1H), 3.56–3.52 (m, 1H), 3.09–3.03 (m, 1H), 2.31 (s, 3H);  $^{13}\text{C}$  NMR (100 MHz,  $\text{CDCl}_3$ )  $\delta$  171.22, 161.38, 158.90, 140.11, 136.62, 135.63, 135.50, 131.53, 129.60, 129.28, 128.92, 128.84, 128.21, 124.32, 116.38, 55.28, 39.67, 21.38; IR (neat)  $\nu$  3256, 2923, 1678, 1523  $\text{cm}^{-1}$ ; HRMS (ESI-TOF) Calcd for  $\text{C}_{28}\text{H}_{19}\text{F}_6\text{NO}$  ( $\text{MH}^+$ ): 500.1444; found: 500.1440.

### C. Amide Hydrolysis.

Acid-catalyzed hydrolysis:<sup>3</sup> MeI (0.24 mmol) and  $\text{Na}_2\text{CO}_3$  (0.4 mmol) were added to a solution of **8** (0.2 mmol) in dichloromethane (1 mL), heated to 100  $^\circ\text{C}$  and stirred for 5 h. The reaction mixture was diluted with dichloromethane (10 mL), washed with 20 mL of saturated  $\text{Na}_2\text{CO}_3$ , 1 N HCl, and brine, and dried over  $\text{Na}_2\text{SO}_4$ . The crude product was concentrated under vacuum and dissolved in 3 N HCl/THF (1:1 mixture, 2 mL) and the solution was stirred at 50  $^\circ\text{C}$  for 24 h. The reaction mixture was extracted with ethyl ether, and the organic layer was washed with 1%  $\text{Na}_2\text{CO}_3$  and brine, dried over  $\text{Na}_2\text{SO}_4$ , and concentrated under vacuum to give the carboxylic acid (33.4, 82%). The  $^1\text{H}$  NMR spectrum was in agreement with those obtained using commercial ibuprofen.

Base-catalyzed hydrolysis:<sup>4</sup> KOH (2.0 mmol) was added to a solution of **8** (0.2 mmol) in ethylene glycol (1 mL). The mixture was heated to 80 °C and stirred for 8 h. After being cooled to room temperature, diethyl ether was added. The whole mixture was washed three times with a 3 N HCl, then once with brine. The organic phase was dried over Na<sub>2</sub>SO<sub>4</sub> and concentrated under vacuum to give the carboxylic acid (36.3 mg, 88%). The <sup>1</sup>H NMR spectrum was in agreement with that obtained using commercial ibuprofen.

## References:

1. Trifilenkov, A. S.; Kobak, V. V.; Salina, M. A.; Kusovkova, J. A.; Ilyin, A. P.; Khvat, A. V.; Tkachenko, S. E.; Ivachtchenko, A. V. *J. Comb. Chem.* **2006**, 8, 469.
2. Ogita, H.; Isobe, Y.; Takaku, H.; Sekine, R.; Goto, Y.; Misawa, S.; Hayashi, H. *Bioorg. Med. Chem. Lett.* **2001**, 11, 549.
3. Koch, K. N.; Linden, A.; Heimgartner, H. *Tetrahedron.* **2001**, 57, 2311.
4. Ooi, T.; Fukumoto, K.; Maruoka, K. *Angew. Chem. Int. Ed.* **2006**, 118, 3923.

1a

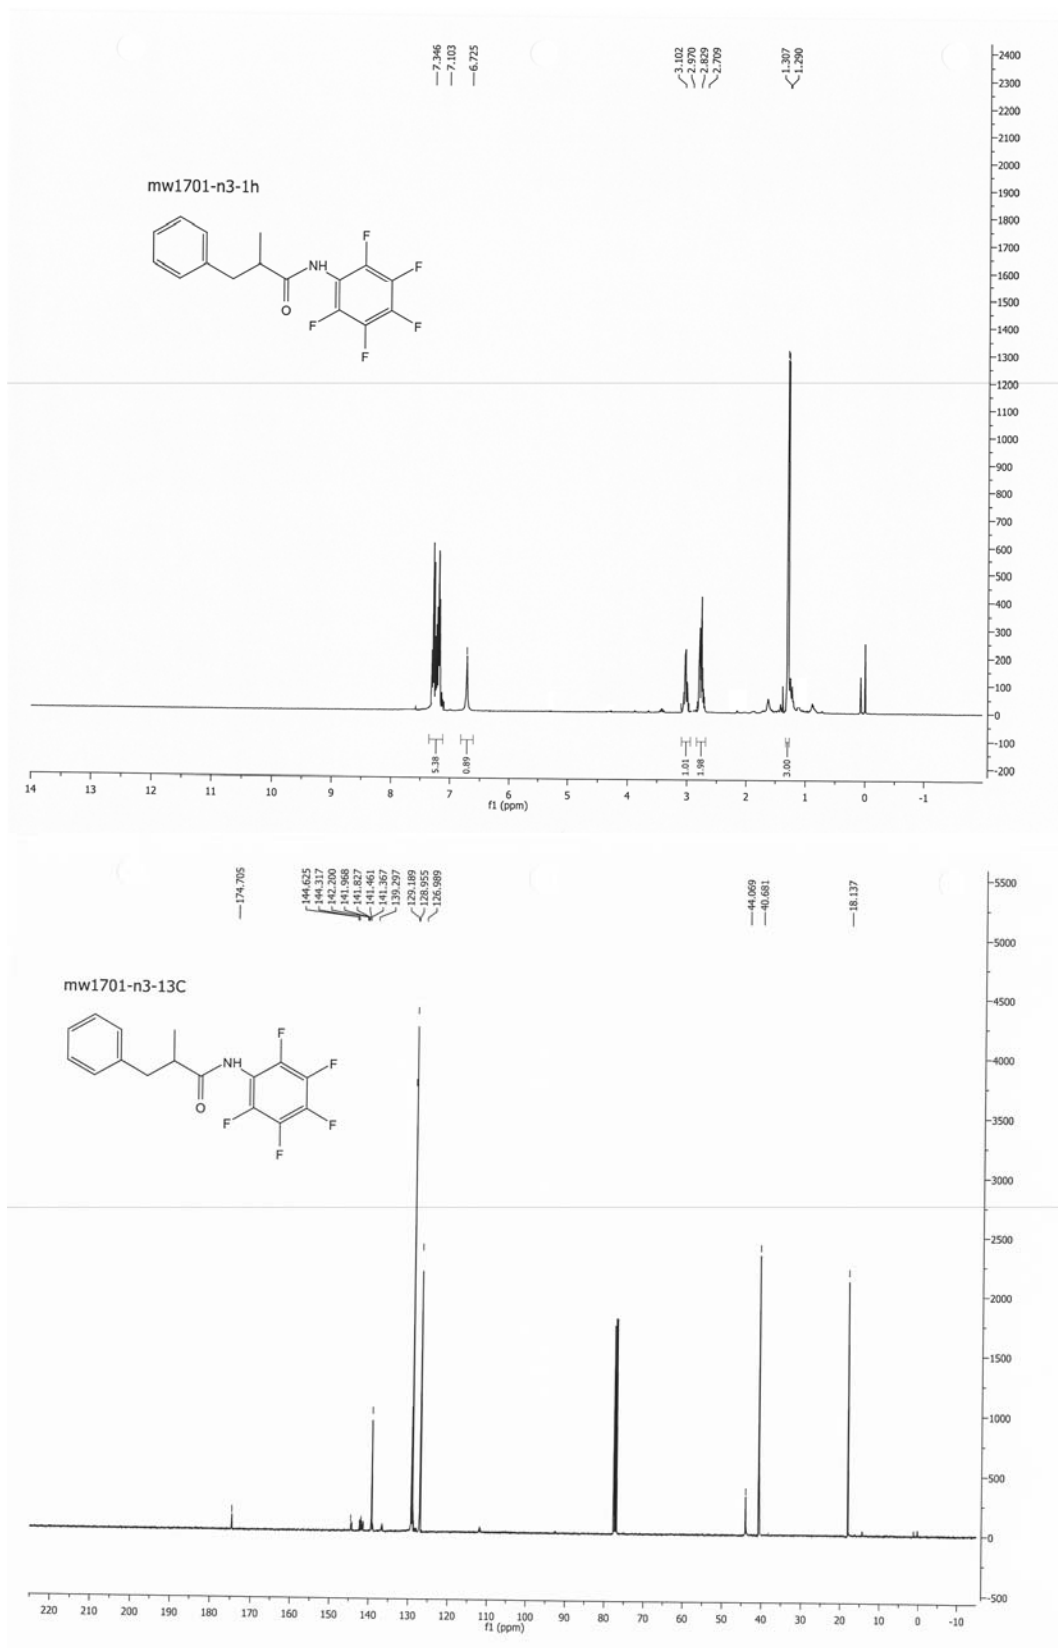

2a

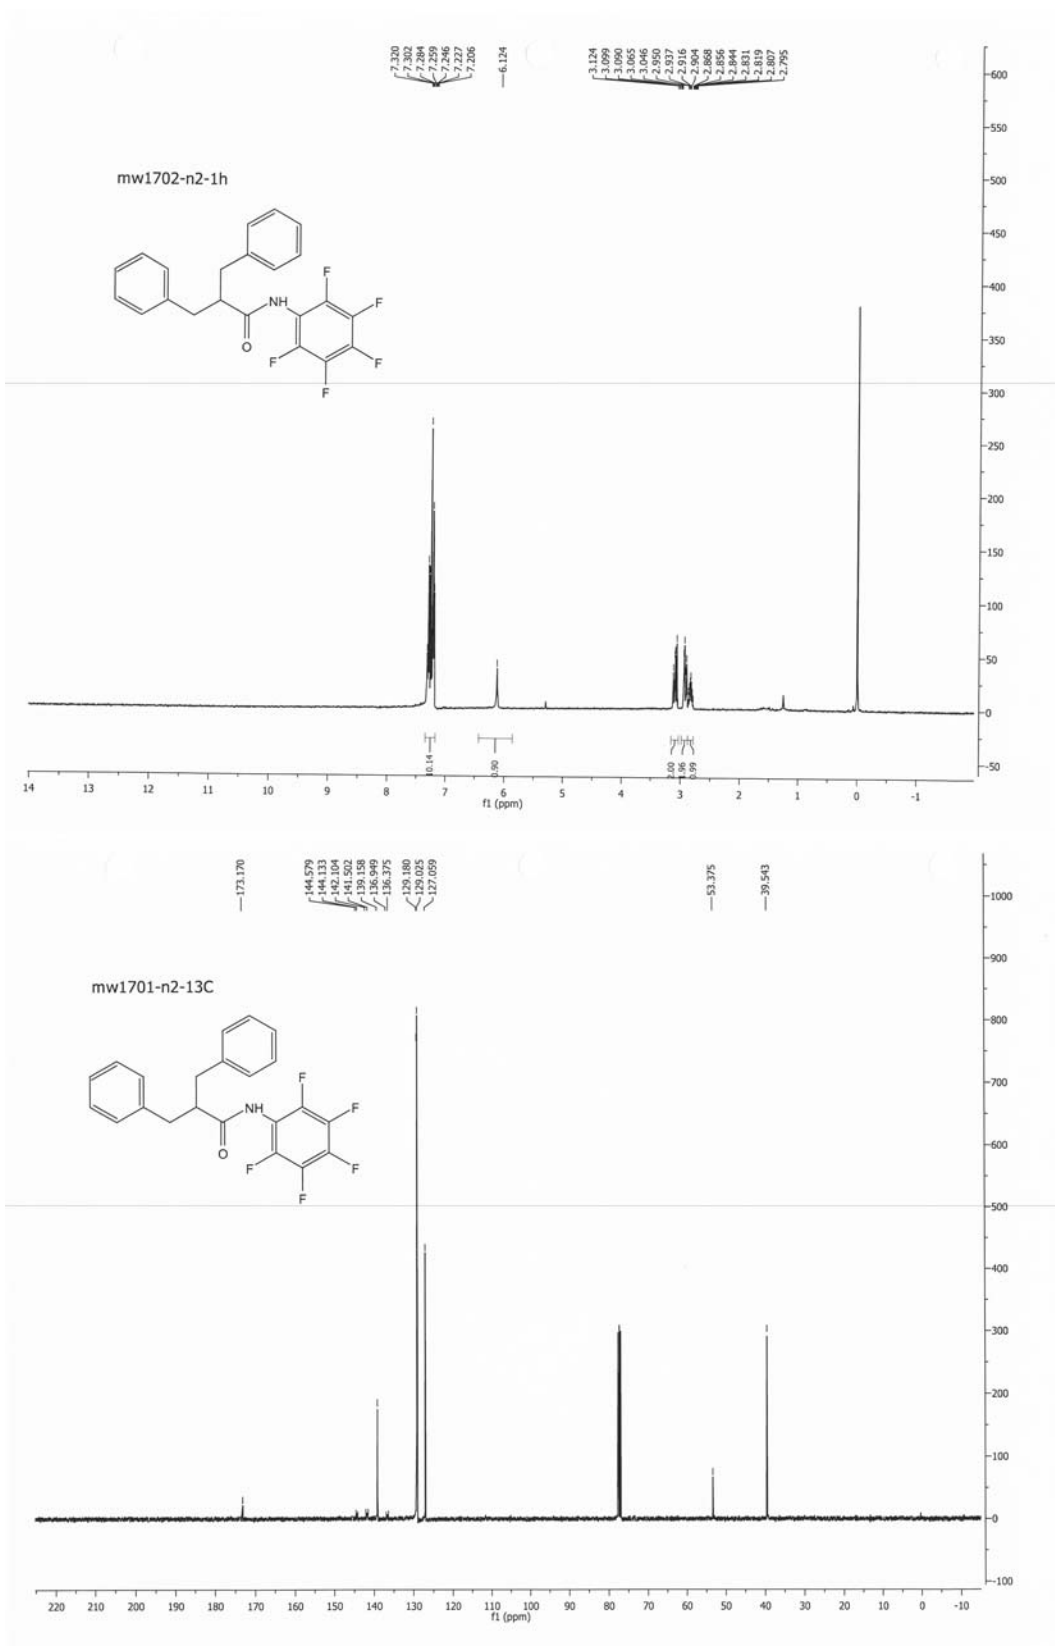

2a

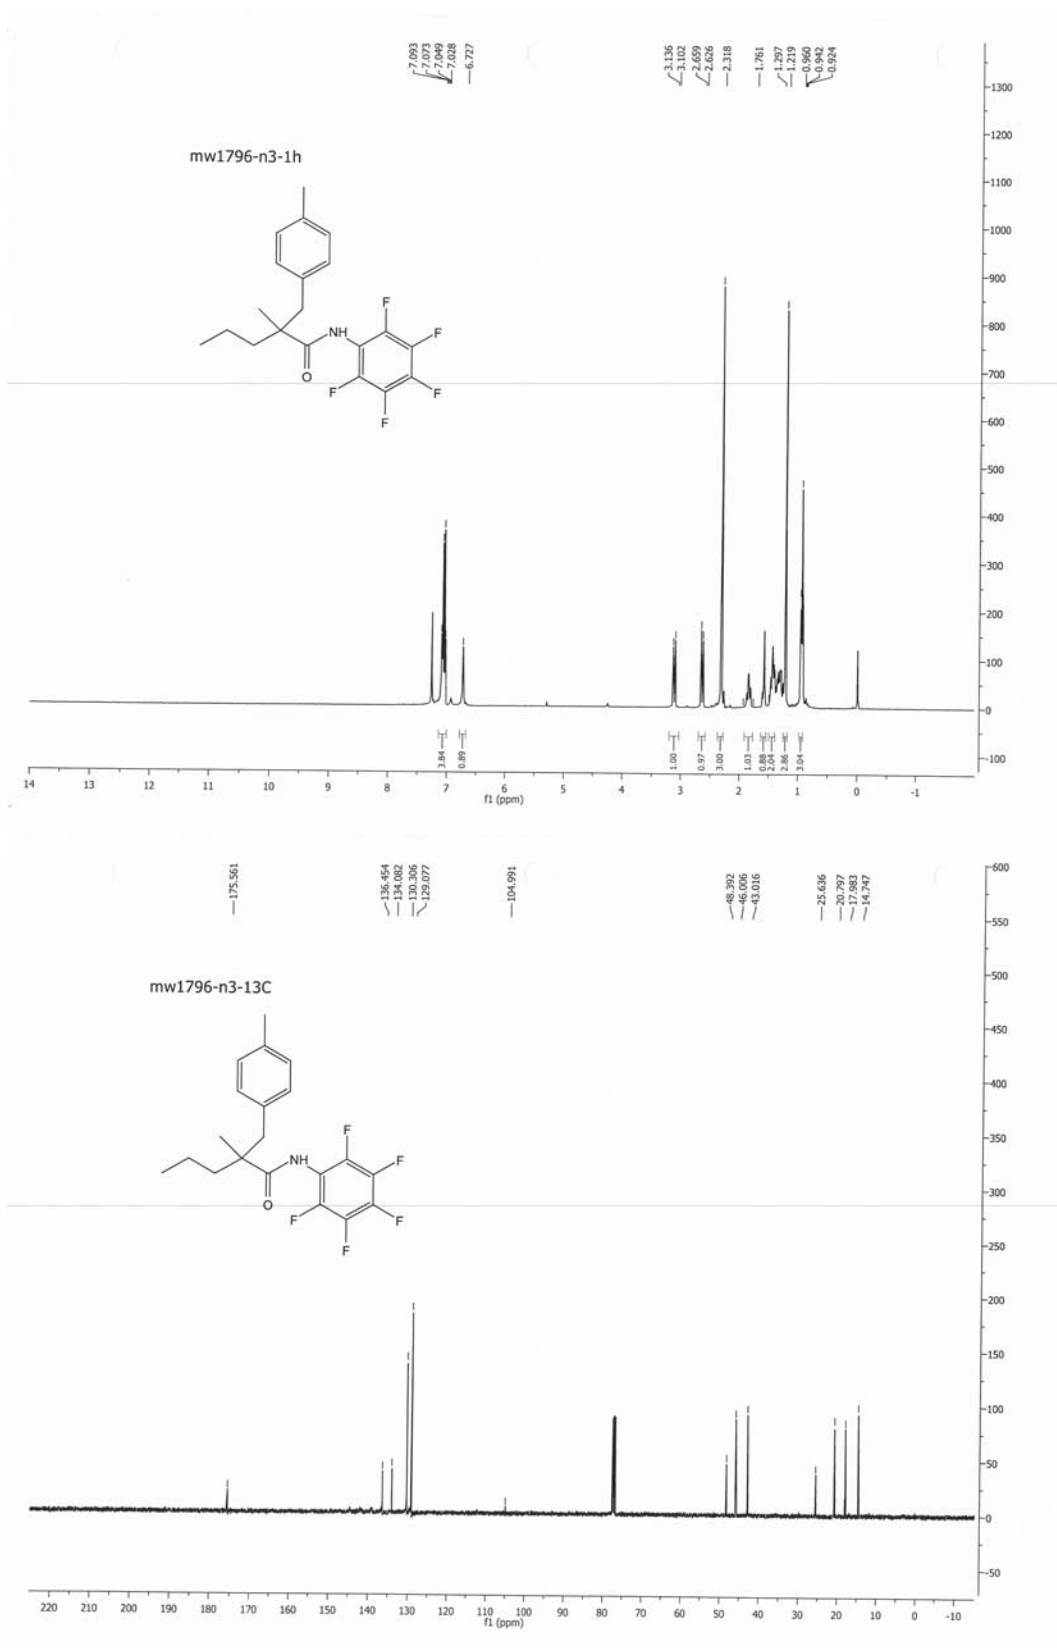

3a

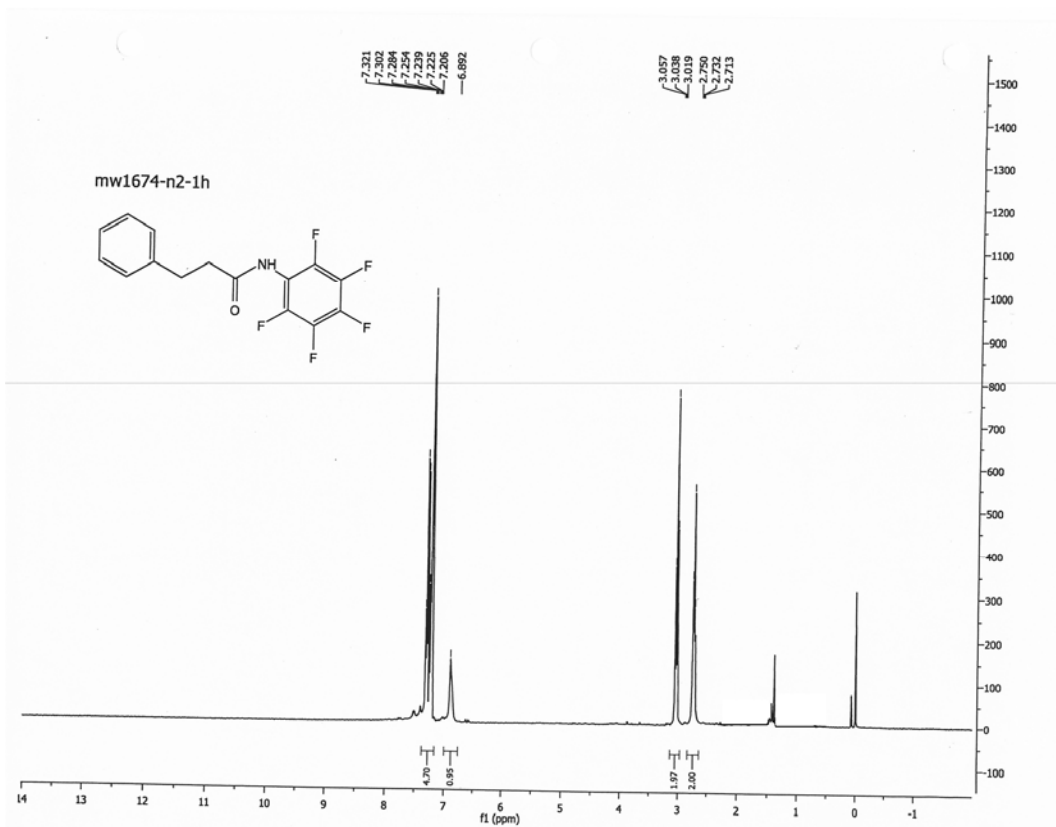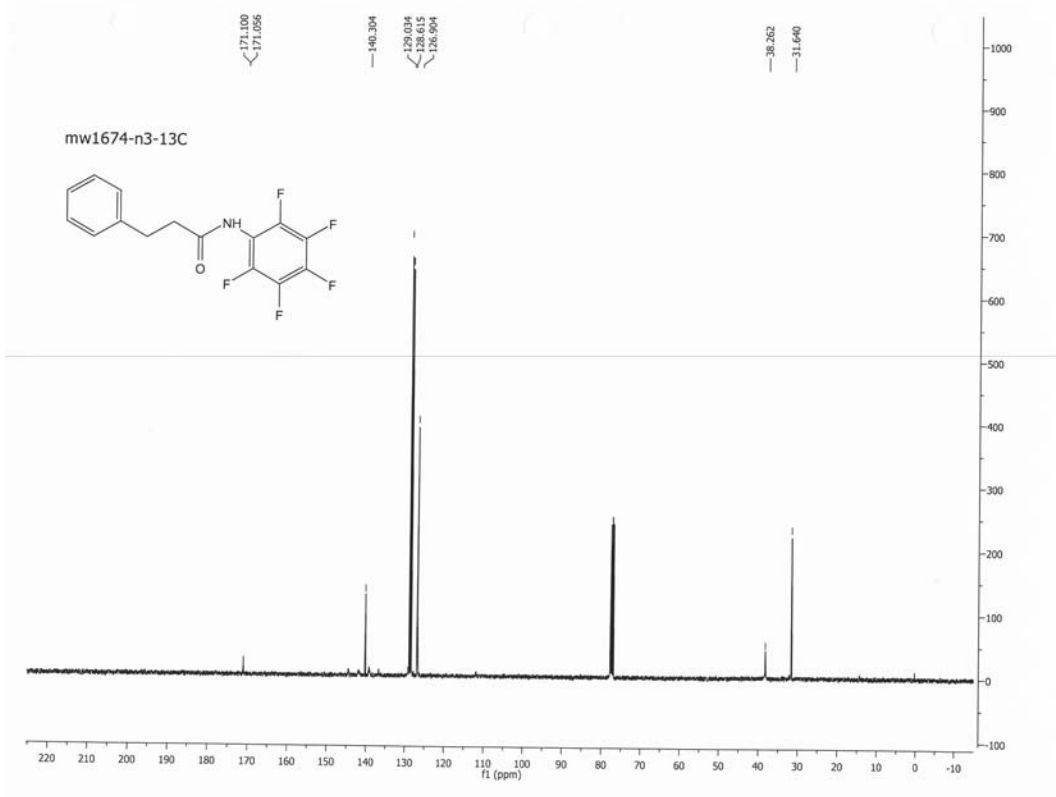

4a

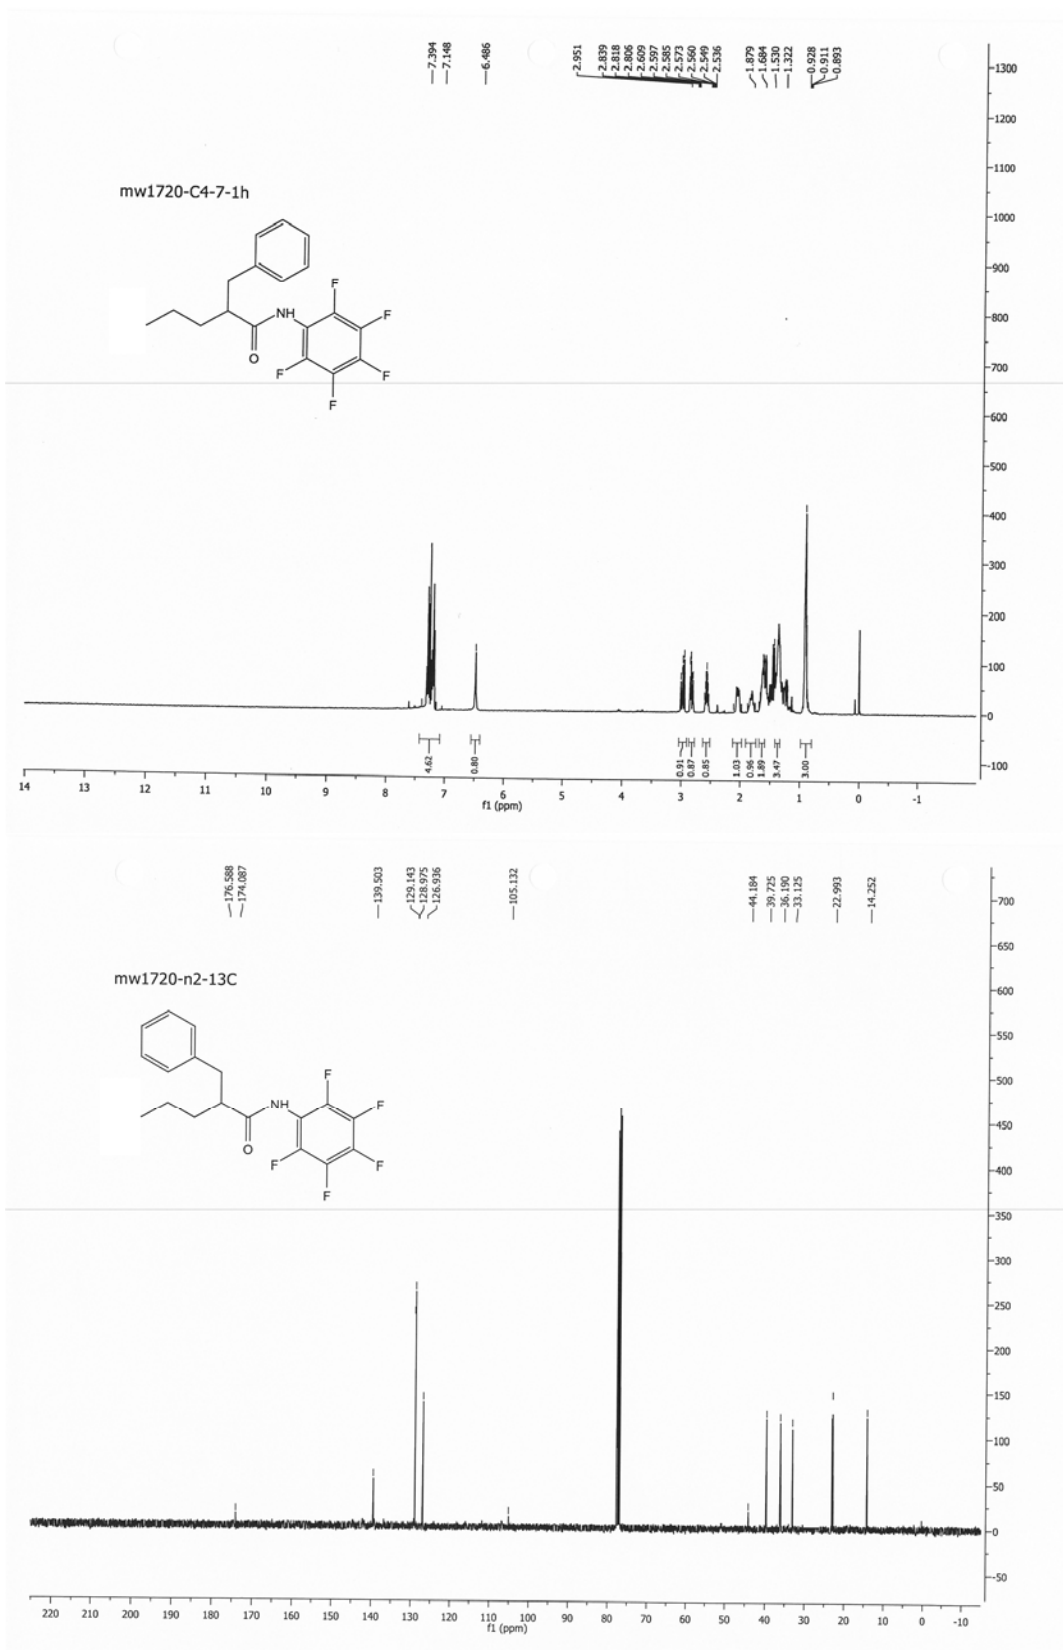

5a

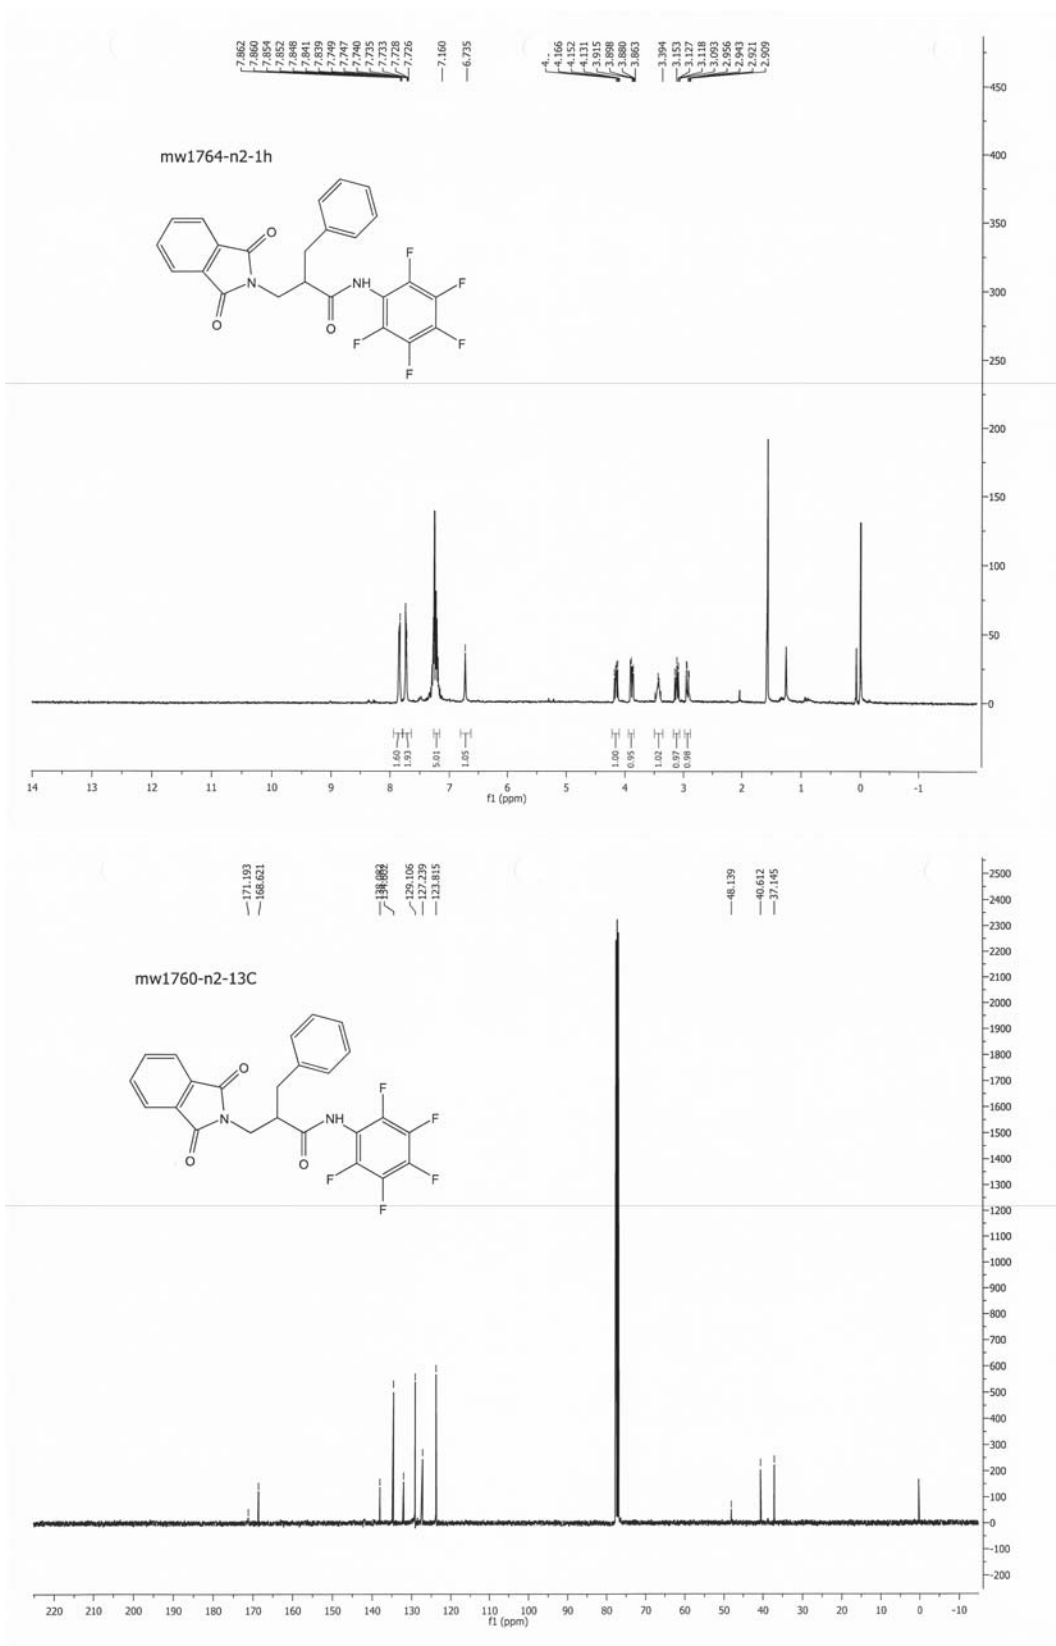

**mw1918-n3-1h**

**mw1918-n3-13C**

6b

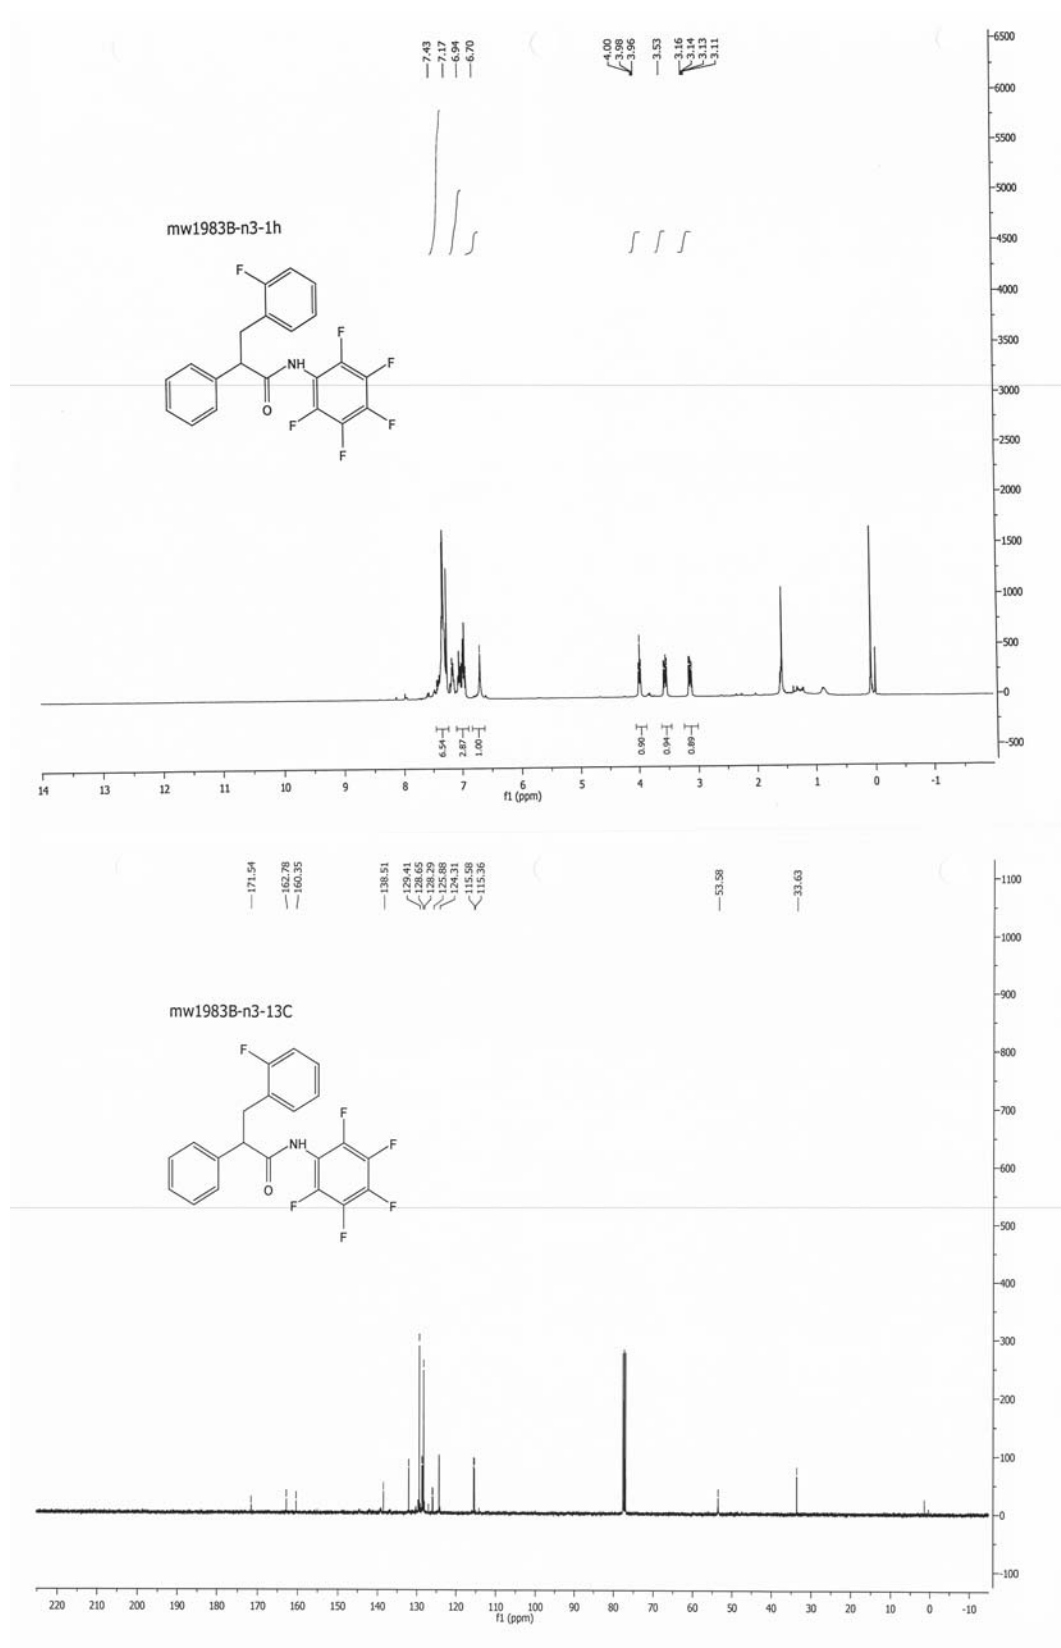

6c

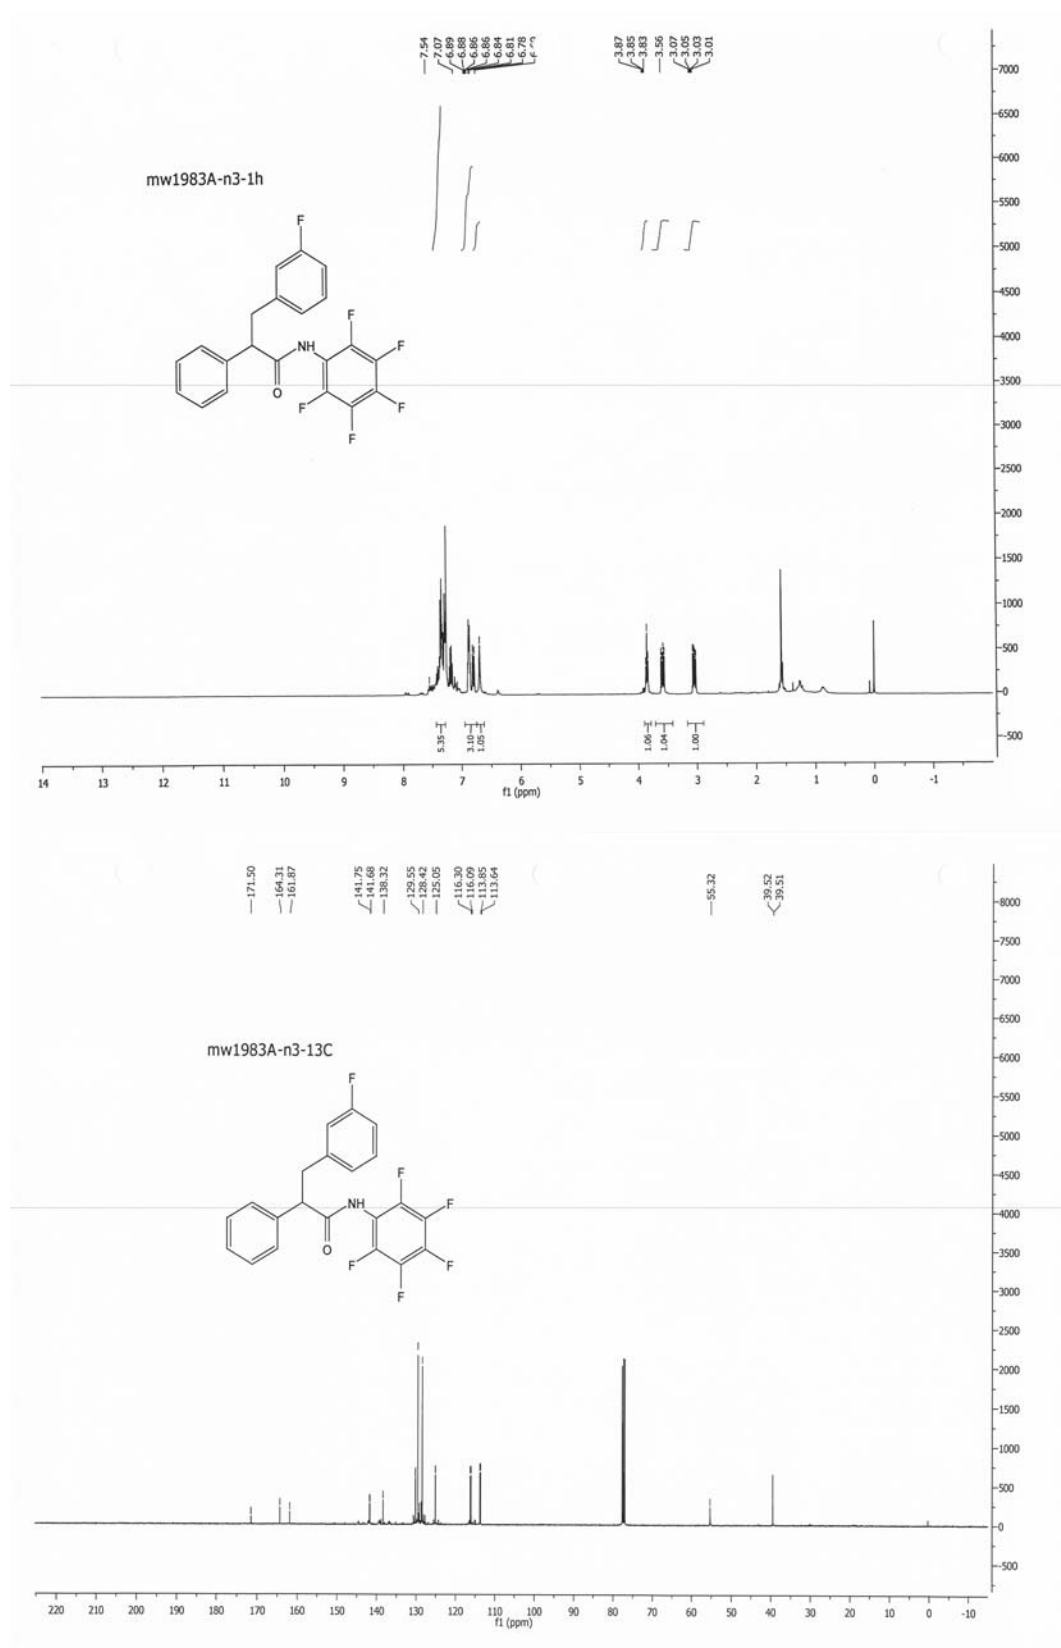

6d

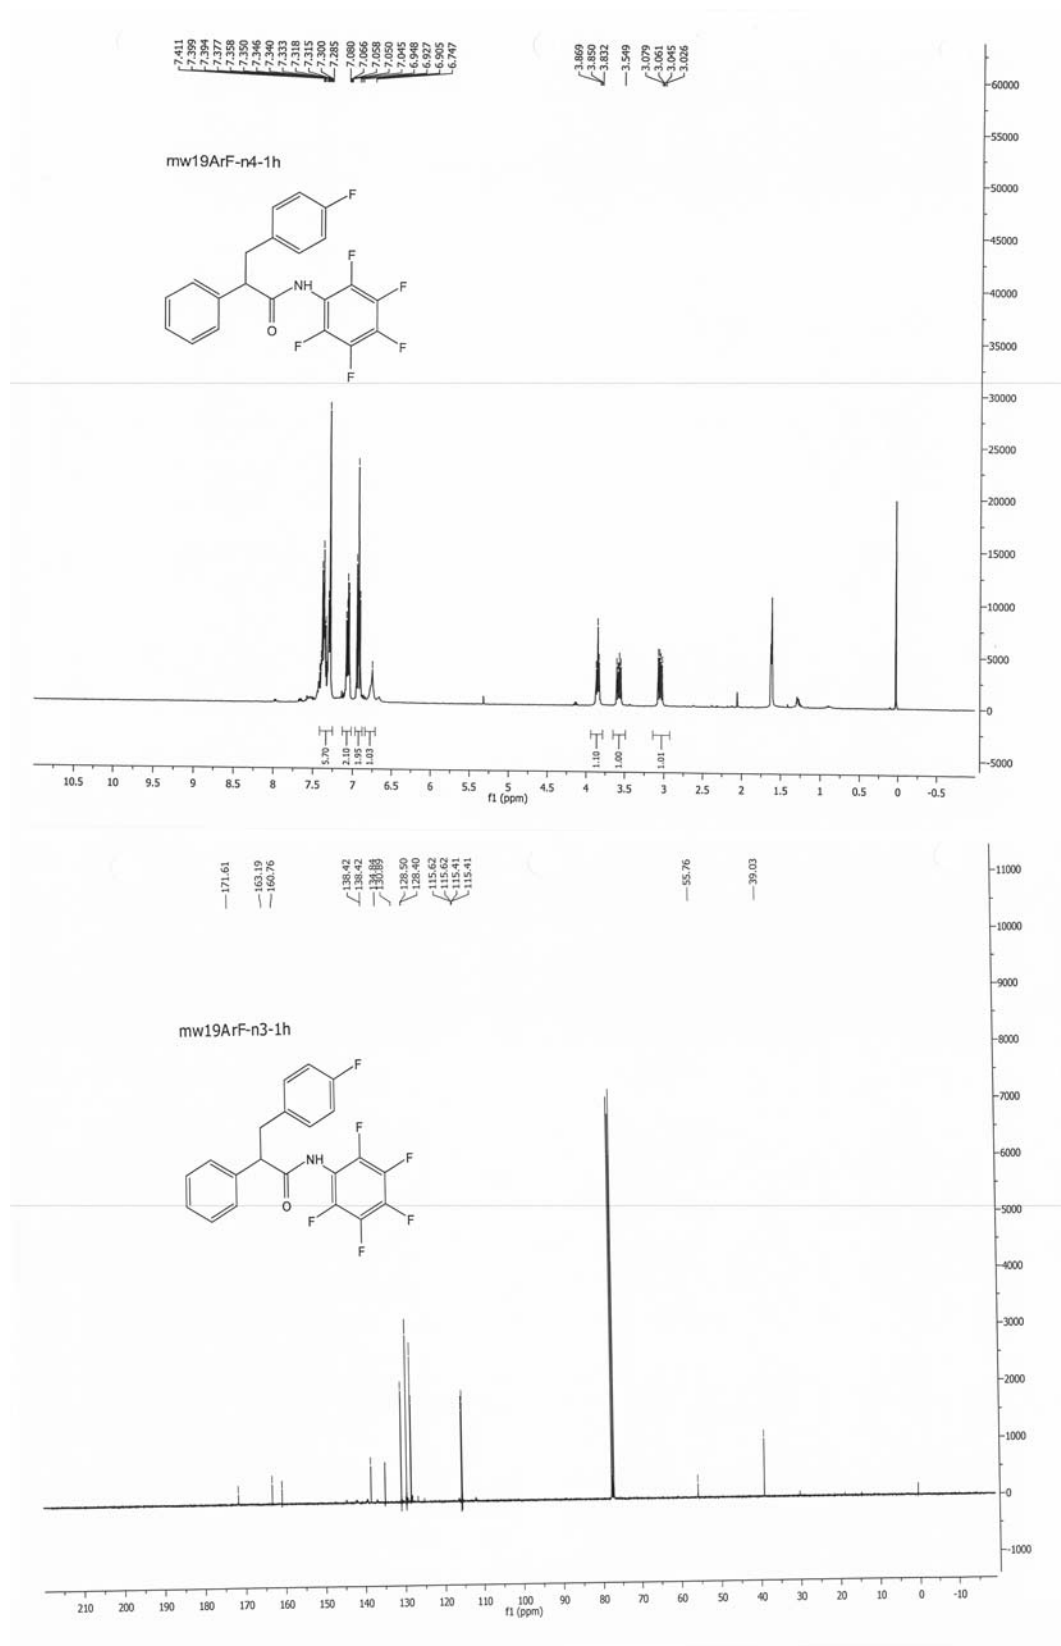

7a

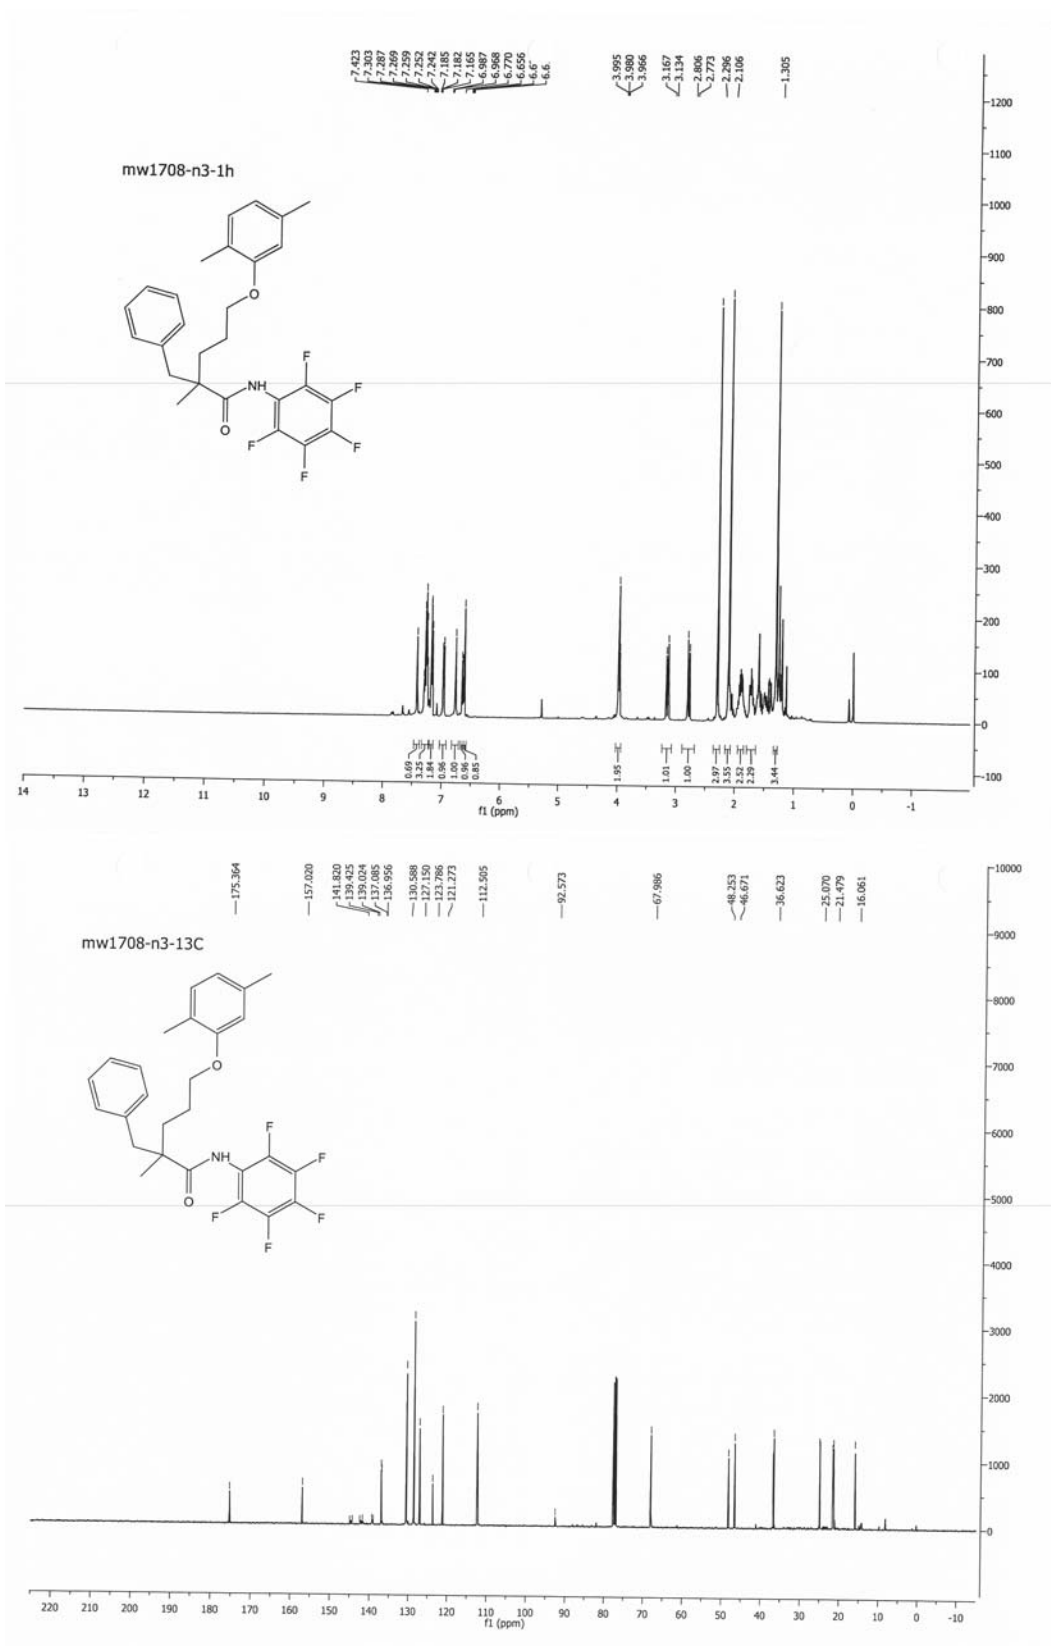

7b

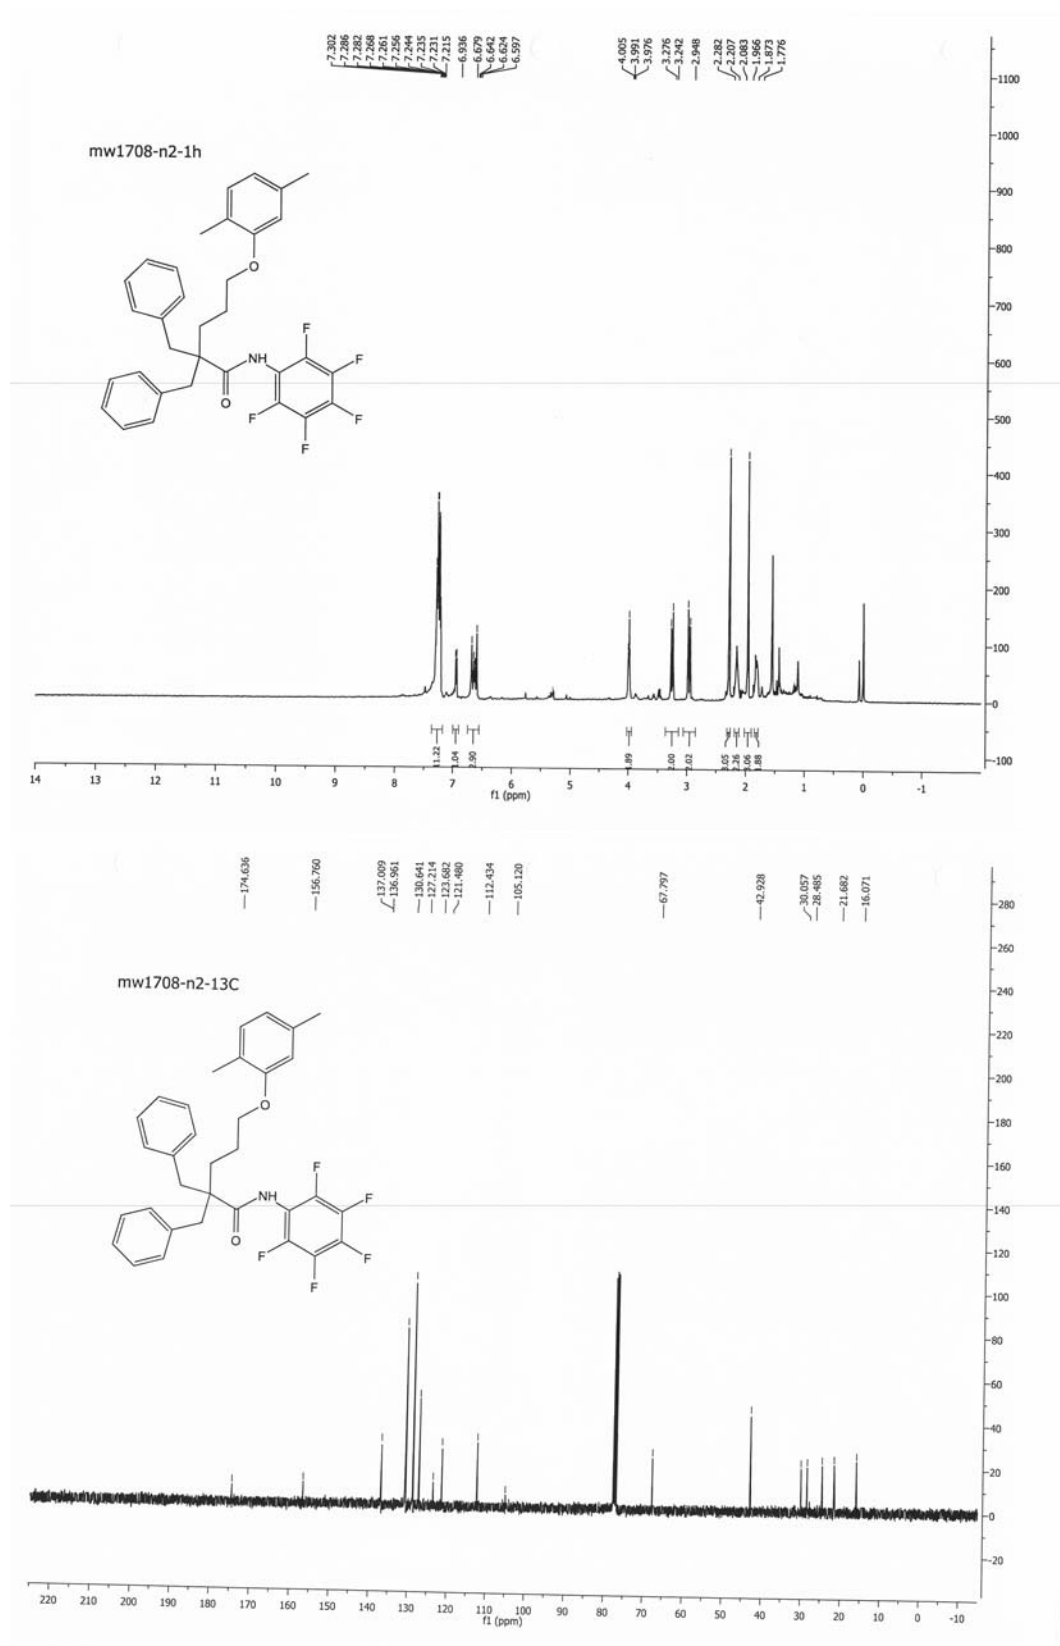

8a

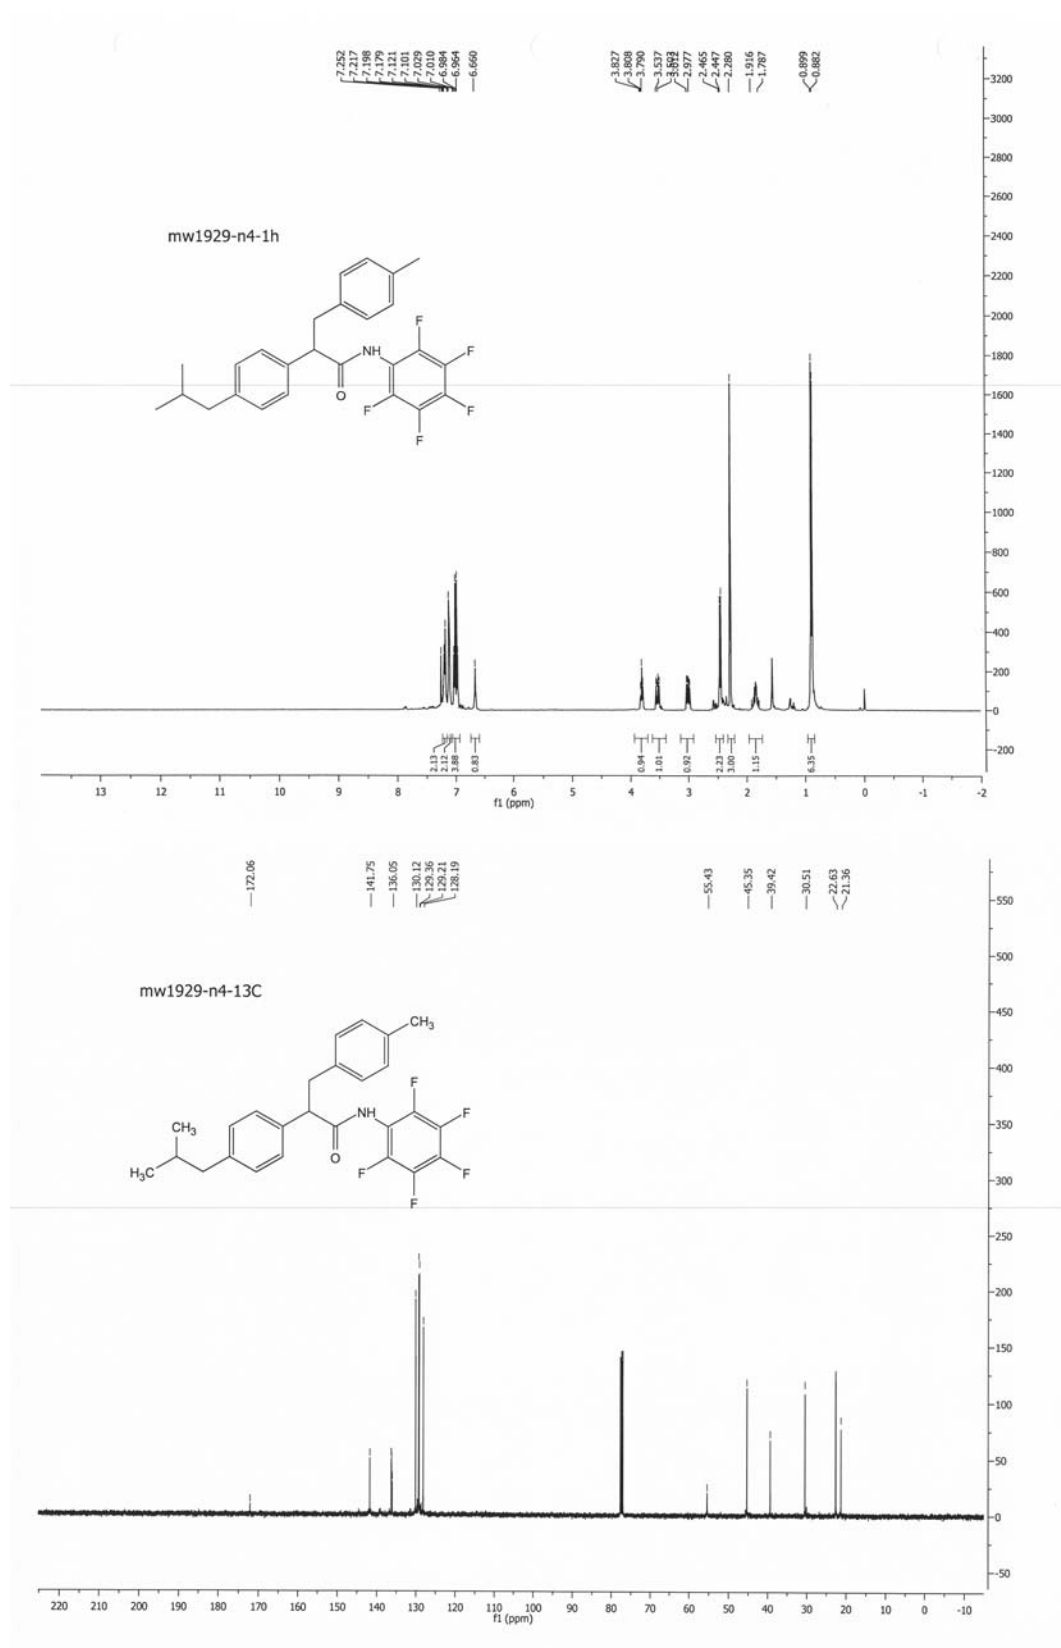

9a

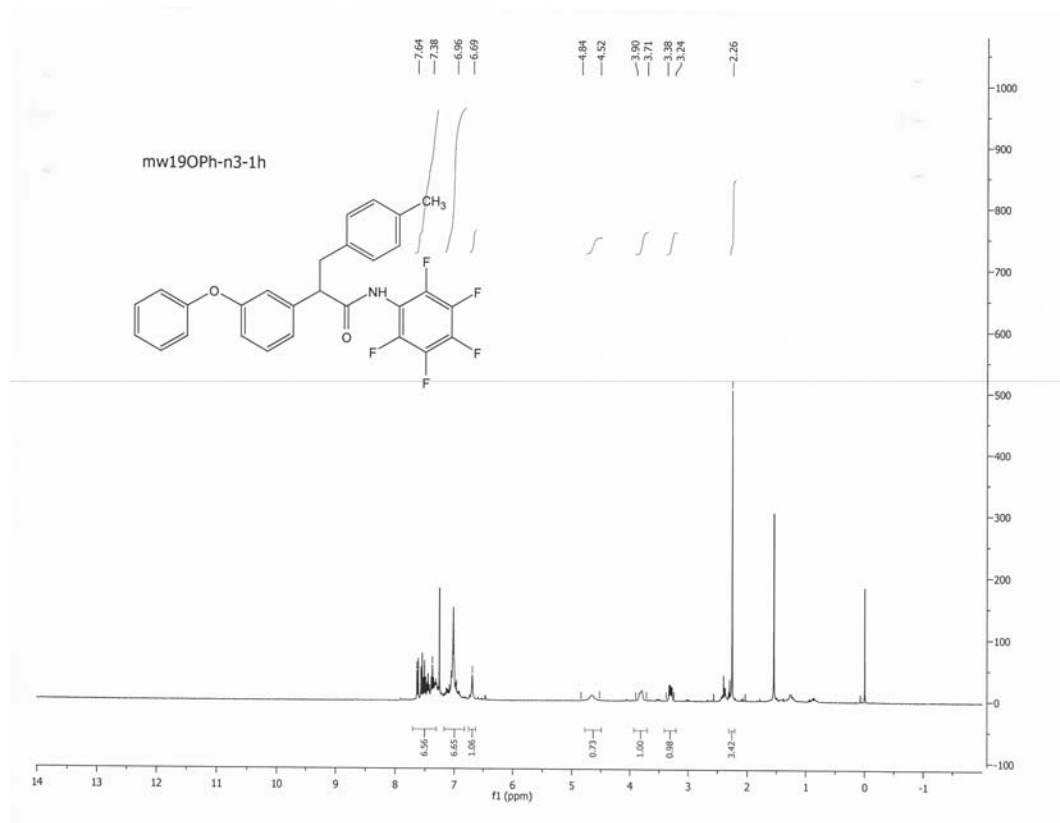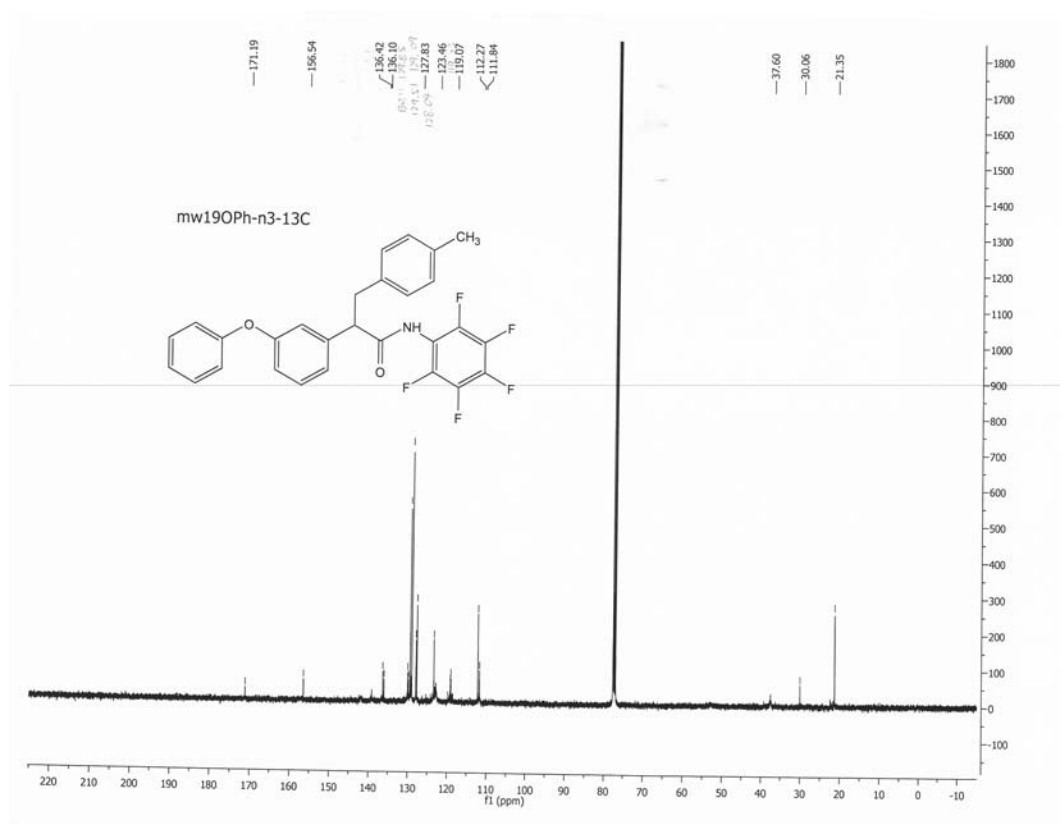

10a

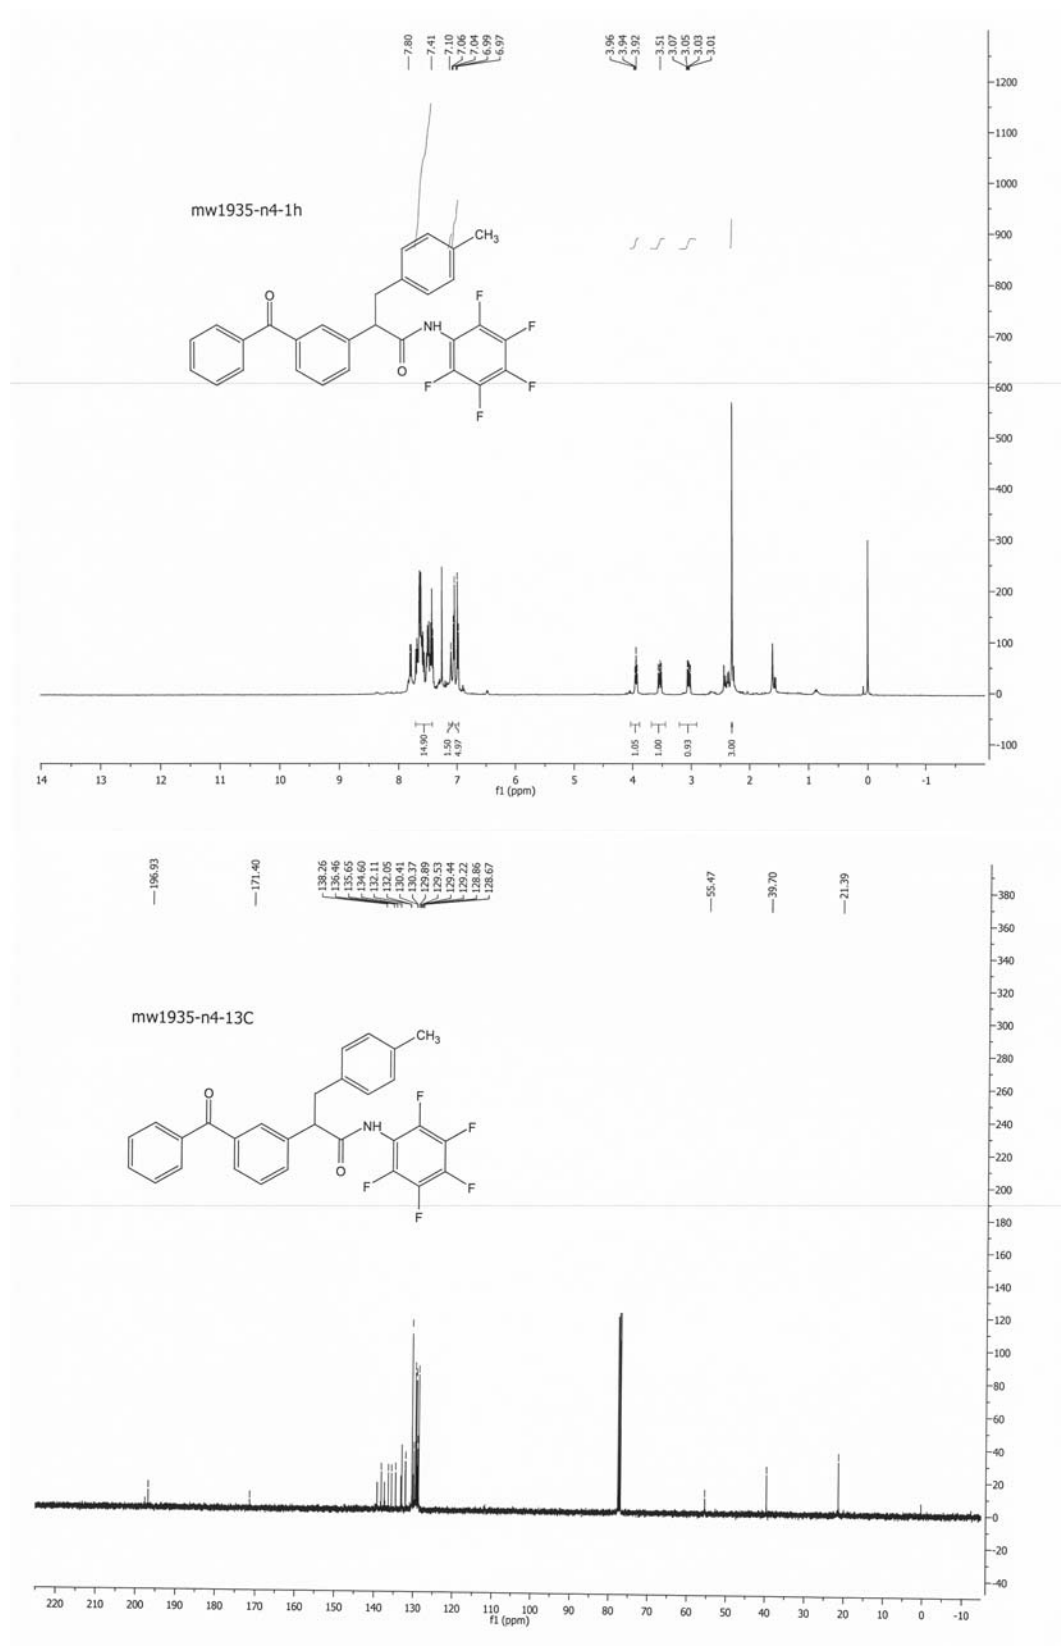

**1H NMR Spectrum (400 MHz, CDCl<sub>3</sub>):**

Chemical structure of **mw1927-n4-1h** is shown. The structure is a 2,4,6-trifluorophenyl amide derivative. The amide nitrogen is attached to a 4-(4-fluorophenyl)-1-phenylethyl group. The amide carbonyl is attached to a 2,4,6-trifluorophenyl group.

Peak list (ppm): 7.589, 7.580, 7.572, 7.566, 7.554, 7.546, 7.493, 7.481, 7.475, 7.464, 7.457, 7.448, 7.432, 7.424, 7.418, 7.404, 7.394, 7.387, 7.372, 7.357, 7.350, 7.033, 6.713, 3.886, 3.868, 3.849, 3.518, 3.085, 3.068, 3.050, 3.033, 2.305.

**13C NMR Spectrum (100 MHz, CDCl<sub>3</sub>):**

Chemical structure of **mw1927-n4-13C** is shown. The structure is a 2,4,6-trifluorophenyl amide derivative. The amide nitrogen is attached to a 4-(4-methylphenyl)-1-phenylethyl group. The amide carbonyl is attached to a 2,4,6-trifluorophenyl group.

Peak list (ppm): 171.22, 161.38, 158.90, 140.11, 140.03, 135.50, 129.28, 128.21, 124.32, 116.38, 116.29, 116.14, 116.05, 55.28, 39.67, 21.38.
